# Supplementary material for: Crown ether-like octanuclear molybdenum(v) clusters for cation binding and gas adsorption
Source: Royal Society of Chemistry journal article supplement (doi:10.1039/d4dt00825a), 2024-01-01
Supplement: d4dt00825a1.pdf [file d4dt00825a1.pdf]

## Supporting materials

### Crown ether-like octanuclear molybdenum(V) clusters for cations-bound and gas adsorptions

Ru-Dan Dai, Zhen-Lang Xie, Cheng Liu, Dong Xin, Zhao-Hui Zhou\*

*Gulei Innovation Institute, Xiamen University, Zhangzhou, 363200; College of Chemistry and Chemical Engineering, Xiamen University, Xiamen, 361005, China., Tel: + 86-592-2184531; Fax: + 86-592-2183047 zhzhou@xmu.edu.cn*

#### Figure and Table Options

**Fig. S1.** Calculated and simulated PXRD patterns of **1** ~ **3**.

**Fig. S2.** TG-DTG curves of **1** ~ **3**.

**Fig. S3.** EPR curves of **1** ~ **3**.

**Fig. S4.** IR spectrum of compound **1**

**Fig. S5.** IR spectrum of compound **2**.

**Fig. S6.** IR spectrum of compound **3**.

**Fig. S7.** Solid-state UV-vis spectra of compounds **1** – **3**, respectively. Color codes: black for **1**, red for **2** and blue for **3**.

**Fig. S8.** (a) UV-vis absorption spectra of **1** in solution (black curve) and solid-state (red curve); (b) Solution UV-vis spectra of **1** – **3**, respectively. Color codes: black for **1**, red for **2** and blue for **3**.

**Fig. S9.** N<sub>2</sub>, CH<sub>4</sub> and H<sub>2</sub> adsorptions for **1** (a), **2** (b), and **3** (c) at different pressures at 298 K, respectively.

**Table S1.** Crystallographic data and structural refinements for complexes Na<sub>8</sub>[Mo<sub>8</sub>O<sub>8</sub>(μ<sub>2</sub>-O)<sub>8</sub>(μ<sub>2</sub>-OH)<sub>8</sub>(3-apz)<sub>4</sub>]<sub>2</sub>·26H<sub>2</sub>O (**1**), K<sub>8</sub>[Mo<sub>8</sub>O<sub>8</sub>(μ<sub>2</sub>-O)<sub>8</sub>(μ<sub>2</sub>-OH)<sub>8</sub>(3-apz)<sub>4</sub>]<sub>2</sub>·7H<sub>2</sub>O (**2**) and (NH<sub>4</sub>)<sub>4</sub>[Mo<sub>8</sub>O<sub>8</sub>(μ<sub>2</sub>-O)<sub>8</sub>(μ<sub>2</sub>-OH)<sub>4</sub>(3-apz)<sub>8</sub>]<sub>2</sub>·20.5H<sub>2</sub>O (**3**) and (Mo<sub>8</sub>O<sub>26</sub>)<sub>n</sub>·4n(3-H<sub>2</sub>apz) (**4**), respectively.

**Table S2.** Selected bond distances (Å) in Na<sub>8</sub>[Mo<sub>8</sub>O<sub>8</sub>(μ<sub>2</sub>-O)<sub>8</sub>(μ<sub>2</sub>-OH)<sub>8</sub>(3-apz)<sub>4</sub>]<sub>2</sub>·26H<sub>2</sub>O (**1**).

**Table S3.** Selected bond angles (°) in Na<sub>8</sub>[Mo<sub>8</sub>O<sub>8</sub>(μ<sub>2</sub>-O)<sub>8</sub>(μ<sub>2</sub>-OH)<sub>8</sub>(3-apz)<sub>4</sub>]<sub>2</sub>·26H<sub>2</sub>O (**1**).

**Table S4.** Selected hydrogen bond distances (Å) and angles (°) in Na<sub>8</sub>[Mo<sub>8</sub>O<sub>8</sub>(μ<sub>2</sub>-O)<sub>8</sub>(μ<sub>2</sub>-OH)<sub>8</sub>(3-apz)<sub>4</sub>]<sub>2</sub>·26H<sub>2</sub>O (**1**).

**Table S5.** Selected bond distances (Å) in K<sub>8</sub>[Mo<sub>8</sub>O<sub>8</sub>(μ<sub>2</sub>-O)<sub>8</sub>(μ<sub>2</sub>-OH)<sub>8</sub>(3-apz)<sub>4</sub>]<sub>2</sub>·7H<sub>2</sub>O (**2**).

**Table S6.** Selected bond angles (°) in  $K_8[Mo_8O_8(\mu_2-O)_8(\mu_2-OH)_8(3-apz)_4]_2 \cdot 7H_2O$  (**2**).

**Table S7.** Selected hydrogen bond distances (Å) and angles (°) in  $K_8[Mo_8O_8(\mu_2-O)_8(\mu_2-OH)_8(3-apz)_4]_2 \cdot 7H_2O$  (**2**).

**Table S8.** Selected bond distances (Å) in  $(NH_4)_4[Mo_8O_8(\mu_2-O)_8(\mu_2-OH)_4(3-apz)_8] \cdot 20.5H_2O$  (**3**).

**Table S9.** Selected bond angles (°) in  $(NH_4)_4[Mo_8O_8(\mu_2-O)_8(\mu_2-OH)_4(3-apz)_8] \cdot 20.5H_2O$  (**3**).

**Table S10.** Selected hydrogen bond distances (Å) and angles (°) in  $(NH_4)_4[Mo_8O_8(\mu_2-O)_8(\mu_2-OH)_4(3-apz)_8] \cdot 20.5H_2O$  (**3**).

**Table S11.** Selected bond distances (Å) in  $(Mo_8O_{26})_n \cdot 4n(3-H_2apz)$  (**4**).

**Table S12.** Selected bond angles (°) in  $(Mo_8O_{26})_n \cdot 4n(3-H_2apz)$  (**4**).

**Table S13** Selected hydrogen bond distances (Å) and angles (°) in  $(Mo_8O_{26})_n \cdot 4n(3-H_2apz)$  (**4**).

**Table S14.** Bond valence calculations for **1** ~ **4** respectively.

**Table S15.** Comparisons of CO<sub>2</sub> adsorption data for **1**, **2** and **3** with some typical MOFs at 1 bar, 298 K.

**Table S16.** Detail calibrated adsorption data of O<sub>2</sub>, CH<sub>4</sub>, H<sub>2</sub>, N<sub>2</sub> and CO<sub>2</sub> for  $Na_8[Mo_8O_8(\mu_2-O)_8(\mu_2-OH)_8(3-apz)_4]_2 \cdot 26H_2O$  (**1**) at 298 K.

**Table S17.** Detail calibrated adsorption data of O<sub>2</sub>, CH<sub>4</sub>, H<sub>2</sub>, N<sub>2</sub> and CO<sub>2</sub> for  $K_8[Mo_8O_8(\mu_2-O)_8(\mu_2-OH)_8(3-apz)_4]_2 \cdot 7H_2O$  (**2**) at 298 K.

**Table S18.** Detail calibrated adsorption data of O<sub>2</sub>, CH<sub>4</sub>, H<sub>2</sub>, N<sub>2</sub> and CO<sub>2</sub> for  $(NH_4)_4[Mo_8O_8(\mu_2-O)_8(\mu_2-OH)_4(3-apz)_8] \cdot 20.5H_2O$  (**3**) at 298 K.

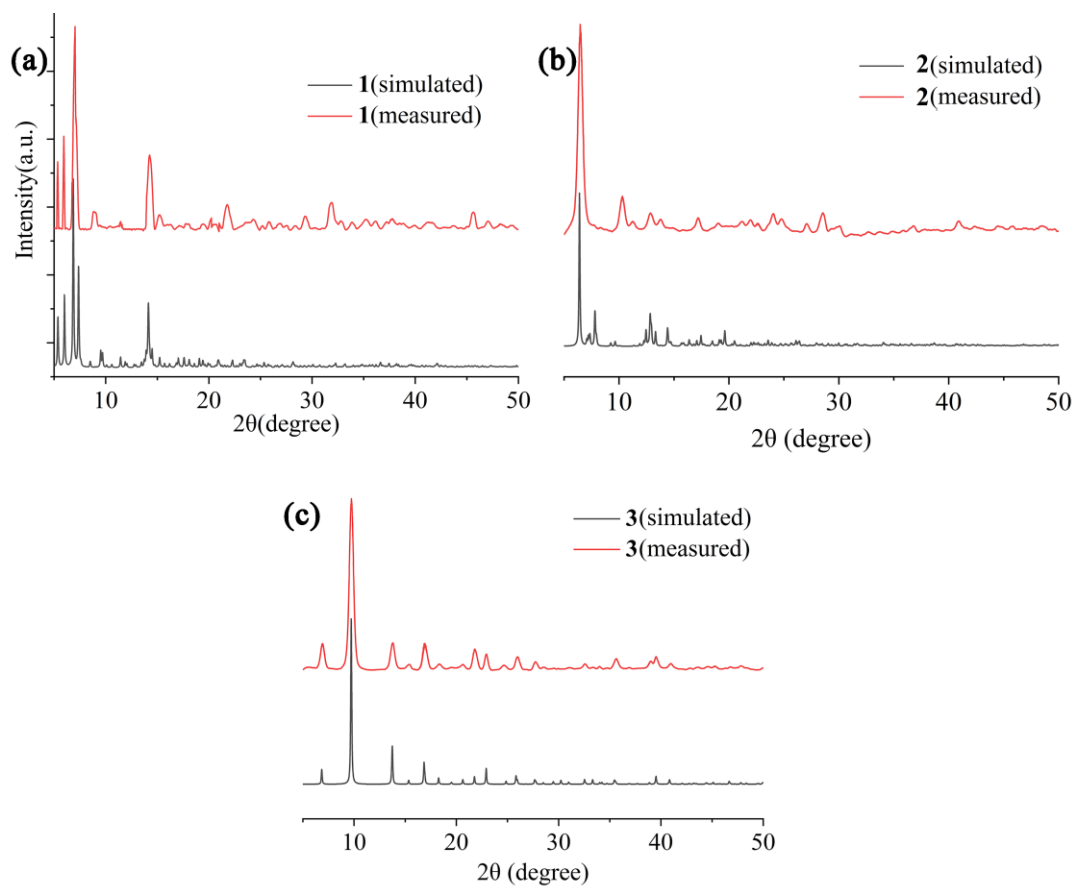

**Fig. S1.** Calculated and simulated PXR patterns of 1 ~ 3.

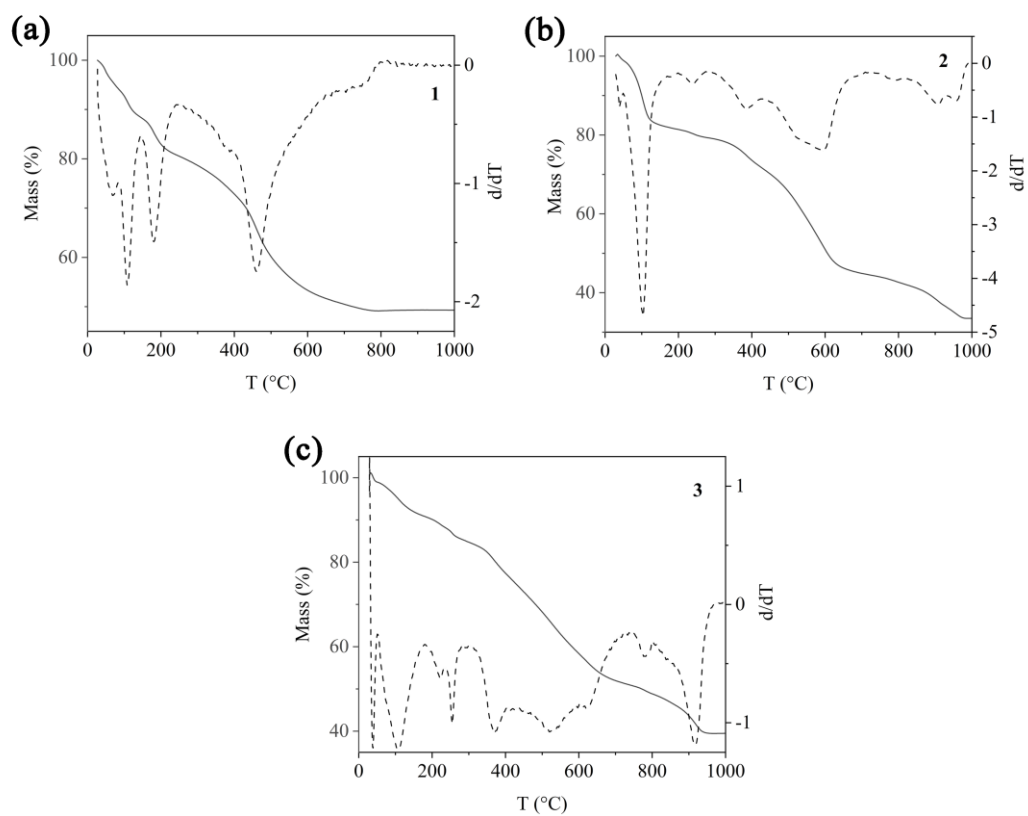

**Fig. S2.** TG-DTG curves of **1 ~ 3**.

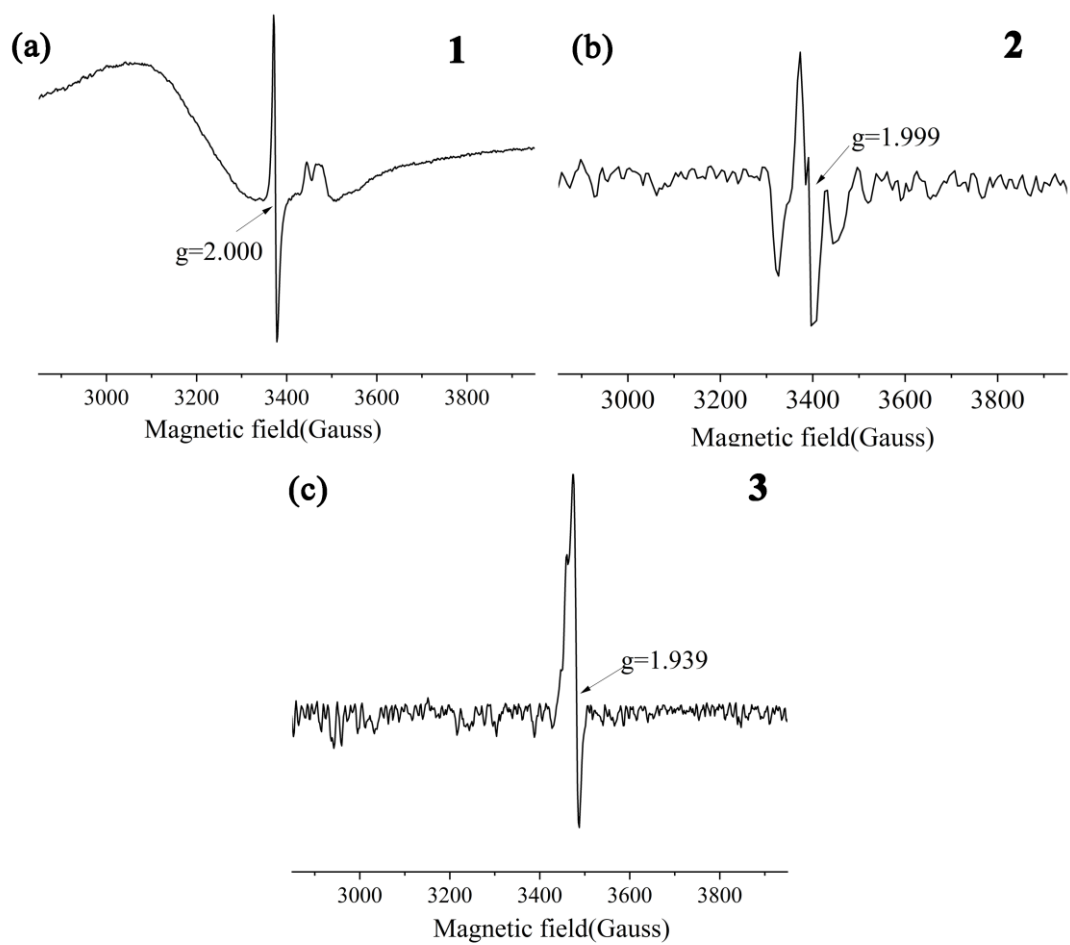

**Fig. S3.** EPR curves of **1 ~ 3**.

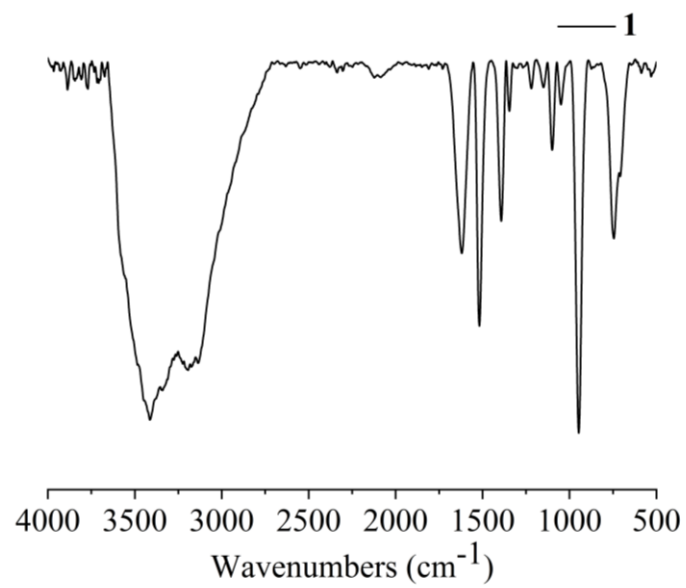

**Fig. S4.** IR spectrum of compound **1**.

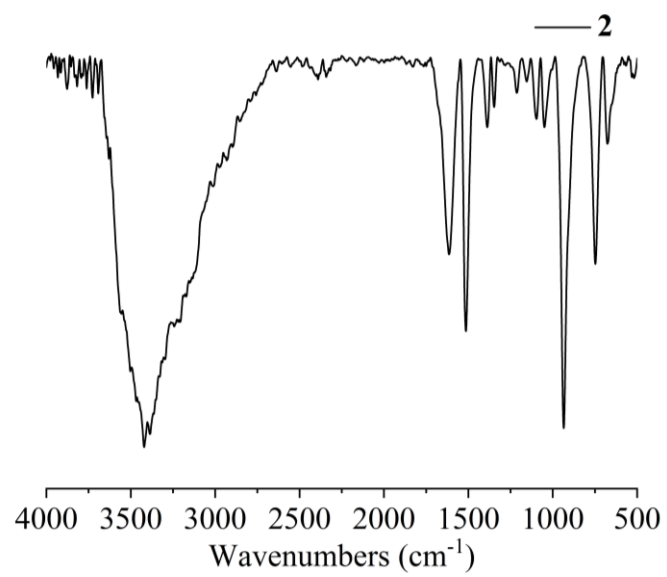

**Fig. S5.** IR spectrum of compound **2**.

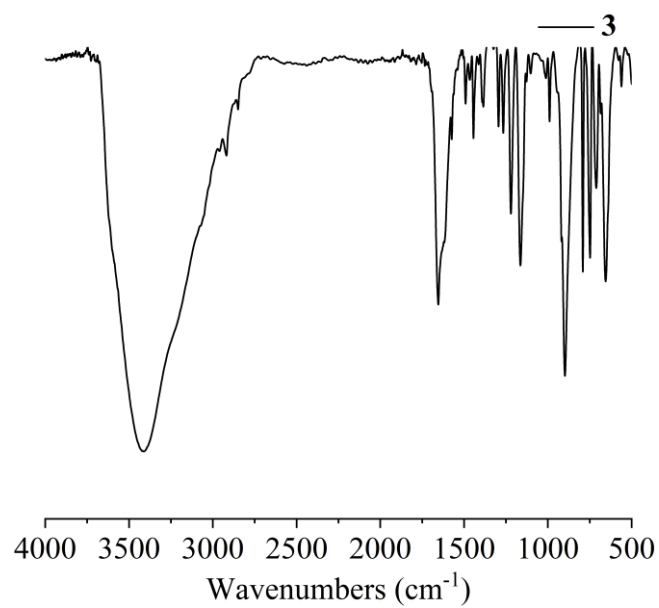

**Fig. S6.** IR spectrum of compound

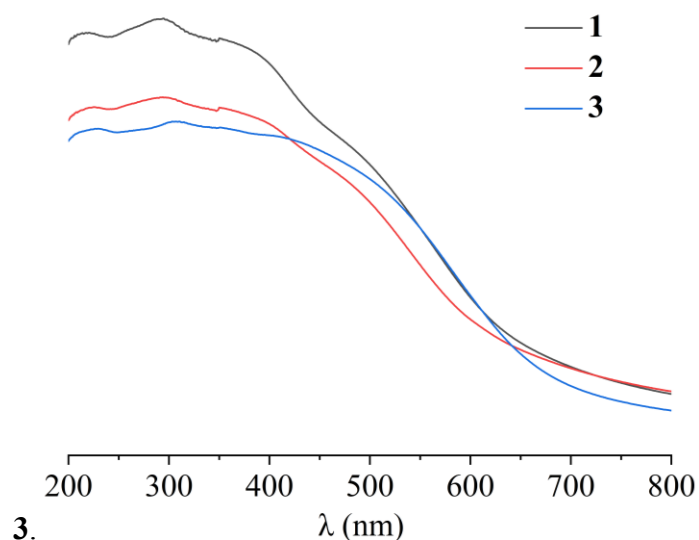

**Fig. S7** Solid-state UV-vis spectra of compounds **1** – **3**, respectively. Color codes: black for **1**, red for **2** and blue for **3**.

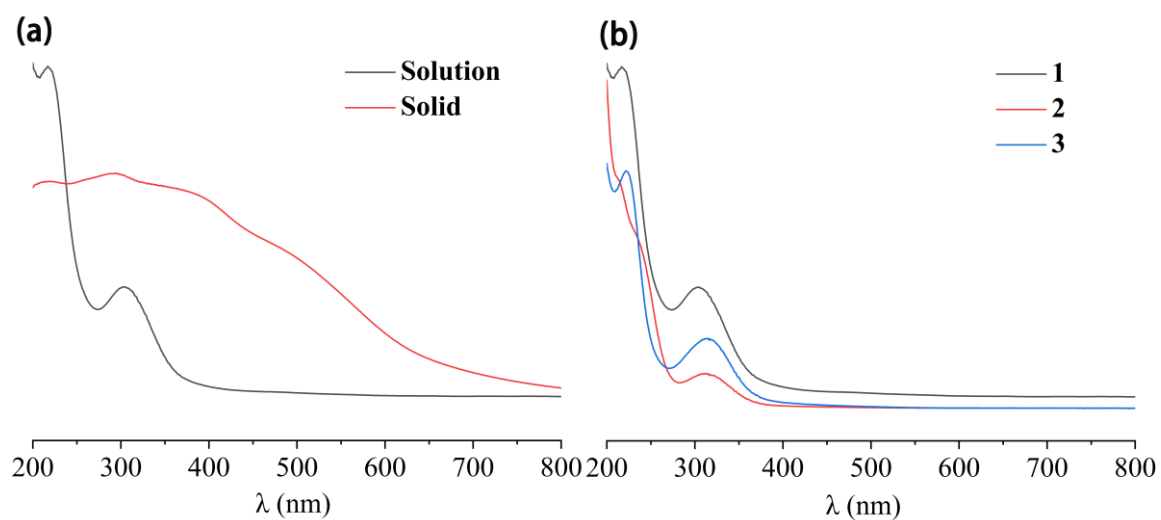

**Fig. S8** (a) UV-vis absorption spectra of **1** in solution (black curve) and solid-state (red curve); (b) Solution UV-vis spectra of **1** – **3**, respectively. Color codes: black for **1**, red for **2** and blue for **3**.



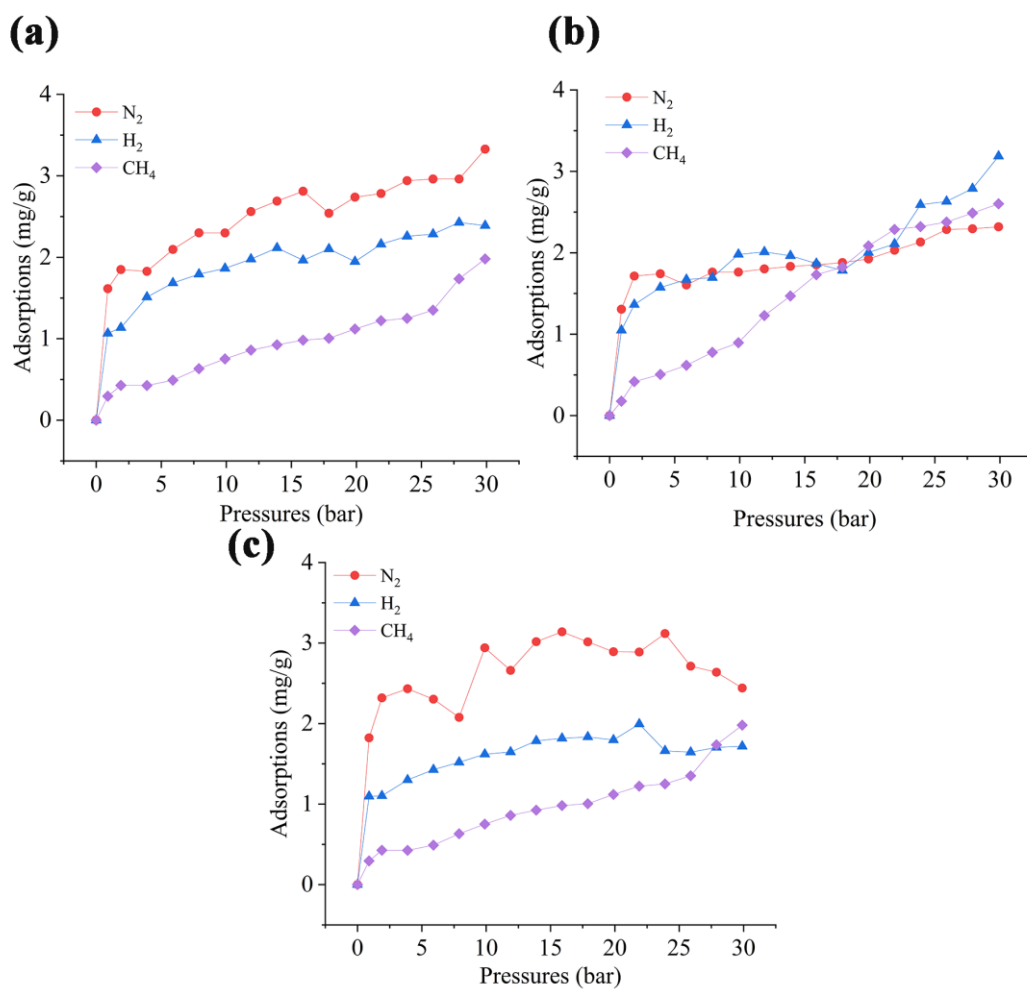

**Fig. S9**  $N_2$ ,  $CH_4$  and  $H_2$  adsorptions for **1** (a), **2** (b), and **3** (c) at different pressures at 298 K, respectively.

**Table S1.** Crystallographic data and structural refinements for complexes  $\text{Na}_8[\text{Mo}_8\text{O}_8(\mu_2\text{-OH})_8(\mu_2\text{-O})_8(3\text{-apz})_4]_2 \cdot 26\text{H}_2\text{O}$  (**1**),  $\text{K}_8[\text{Mo}_8\text{O}_8(\mu_2\text{-OH})_8(\mu_2\text{-O})_8(3\text{-apz})_4]_2 \cdot 7\text{H}_2\text{O}$  (**2**) and  $(\text{NH}_4)_2[\text{Mo}_8\text{O}_8(\mu_2\text{-O})_{12}(\mu_2\text{-OH})_4(3\text{-apz})_8] \cdot 20.5\text{H}_2\text{O}$  (**3**) and  $(\text{Mo}_8\text{O}_{26})_n \cdot 4n(3\text{-H}_2\text{apz})$  (**4**), respectively.

| Identification codes                          | <b>1</b>                                                                        | <b>2</b>                                                                       | <b>3</b>                                                          | <b>4</b>                                                          |
|-----------------------------------------------|---------------------------------------------------------------------------------|--------------------------------------------------------------------------------|-------------------------------------------------------------------|-------------------------------------------------------------------|
| Empirical formula                             | $\text{C}_{24}\text{H}_{29}\text{Mo}_{16}\text{N}_{23}\text{Na}_2\text{O}_{49}$ | $\text{C}_{24}\text{H}_{78}\text{K}_8\text{Mo}_{16}\text{N}_{24}\text{O}_{68}$ | $\text{C}_{24}\text{H}_{36}\text{Mo}_8\text{N}_{26}\text{O}_{20}$ | $\text{C}_{19}\text{H}_{24}\text{Mo}_8\text{N}_{12}\text{O}_{26}$ |
| Formula weight                                | 3004.72                                                                         | 3638.94                                                                        | 1748.29                                                           | 1519.95                                                           |
| Temperature/K                                 | 100(1)                                                                          | 100(1)                                                                         | 100(1)                                                            | 100(1)                                                            |
| Crystal system                                | tetragonal                                                                      | monoclinic                                                                     | tetragonal                                                        | triclinic                                                         |
| Space group                                   | $P-42_1c$                                                                       | $P2_1/n$                                                                       | $I4/m$                                                            | $P\bar{1}$                                                        |
| $a/\text{\AA}$                                | 32.8779(2)                                                                      | 15.3641(1)                                                                     | 18.2472(7)                                                        | 7.8832(6)                                                         |
| $b/\text{\AA}$                                | 32.8779(2)                                                                      | 24.4988(2)                                                                     | 18.2472(7)                                                        | 10.3837(8)                                                        |
| $c/\text{\AA}$                                | 20.6940(2)                                                                      | 25.6724(2)                                                                     | 10.4717(12)                                                       | 11.8466(8)                                                        |
| $\alpha/^\circ$                               | 90                                                                              | 90                                                                             | 90                                                                | 104.127(6)                                                        |
| $\beta/^\circ$                                | 90                                                                              | 96.397(1)                                                                      | 90                                                                | 104.250(7)                                                        |
| $\gamma/^\circ$                               | 90                                                                              | 90                                                                             | 90                                                                | 102.460(7)                                                        |
| Volume/ $\text{\AA}^3$                        | 22369.3(3)                                                                      | 9603.0(1)                                                                      | 3486.7(5)                                                         | 871.3(1)                                                          |
| $Z$                                           | 8                                                                               | 4                                                                              | 2                                                                 | 2                                                                 |
| $\rho_{\text{calc}}/\text{g/cm}^3$            | 1.784                                                                           | 2.517                                                                          | 1.665                                                             | 2.839                                                             |
| $\mu/\text{mm}^{-1}$                          | 14.911                                                                          | 20.653                                                                         | 12.001                                                            | 23.857                                                            |
| $F(000)$                                      | 11360                                                                           | 7032                                                                           | 1688.0                                                            | 724.0                                                             |
| Crystal size/ $\text{mm}^3$                   | $0.15 \times 0.10 \times 0.10$                                                  | $0.15 \times 0.15 \times 0.10$                                                 | $0.20 \times 0.10 \times 0.10$                                    | $0.15 \times 0.11 \times 0.10$                                    |
| Radiation ( $\text{\AA}$ )                    | Cu $K\alpha$ ( $\lambda = 1.54184$ )                                            | Cu $K\alpha$ ( $\lambda = 1.54184$ )                                           | Cu $K\alpha$ ( $\lambda = 1.54184$ )                              | Cu $K\alpha$ ( $\lambda = 1.54184$ )                              |
| $2\theta$ range for data collection/ $^\circ$ | 5.046 to 127.99                                                                 | 5 to 136.494                                                                   | 6.85 to 127.954                                                   | 8.11 to 127.99                                                    |

|                                                          |                                                                        |                                                                        |                                                                        |                                                                     |
|----------------------------------------------------------|------------------------------------------------------------------------|------------------------------------------------------------------------|------------------------------------------------------------------------|---------------------------------------------------------------------|
| Index ranges                                             | $-38 \leq h \leq 26,$<br>$-35 \leq k \leq 38,$<br>$-17 \leq l \leq 24$ | $-18 \leq h \leq 18,$<br>$-29 \leq k \leq 27,$<br>$-20 \leq l \leq 30$ | $-21 \leq h \leq 12,$<br>$-20 \leq k \leq 18,$<br>$-11 \leq l \leq 12$ | $-9 \leq h \leq 9,$<br>$-12 \leq k \leq 12,$<br>$-13 \leq l \leq 7$ |
| Reflections collected                                    | 46232                                                                  | 62561                                                                  | 5042                                                                   | 7409                                                                |
| Independent reflections                                  | 18230 ( $R_{\text{int}} = 0.0526,$<br>$R_{\sigma} = 0.0601$ )          | 17569 ( $R_{\text{int}} = 0.0263,$<br>$R_{\sigma} = 0.0207$ )          | 1545 ( $R_{\text{int}} = 0.0332,$<br>$R_{\sigma} = 0.0318$ )           | 2867 ( $R_{\text{int}} = 0.0567,$<br>$R_{\sigma} = 0.0525$ )        |
| Data/restraints/parameters                               | 18230/114/1065                                                         | 17549/66/1181                                                          | 1545/2/109                                                             | 2867/0/265                                                          |
| Goodness-of-fit on $F^2$                                 | 1.056                                                                  | 1.012                                                                  | 1.061                                                                  | 1.052                                                               |
| Final $R$ indexes [ $I \geq 2\sigma$<br>( $I$ )]         | $R_1 = 0.0506,$<br>$wR_2 = 0.1302$                                     | $R_1 = 0.0441,$<br>$wR_2 = 0.1150$                                     | $R_1 = 0.0468,$<br>$wR_2 = 0.1358$                                     | $R_1 = 0.0449,$<br>$wR_2 = 0.1170$                                  |
| Final $R$ indexes [all data]                             | $R_1 = 0.0594,$<br>$wR_2 = 0.1356$                                     | $R_1 = 0.0478,$<br>$wR_2 = 0.1182$                                     | $R_1 = 0.0535,$<br>$wR_2 = 0.1406$                                     | $R_1 = 0.0480,$<br>$wR_2 = 0.1195$                                  |
| Largest<br>peak/hole/ $e \cdot \text{\AA}^{-3}$<br>diff. | 1.79/-0.98                                                             | 3.17/-2.38                                                             | 1.10/-0.55                                                             | 1.54/-1.74                                                          |

**Table S2.** Selected bond distances ( Å ) in  $\text{Na}_8[\text{Mo}_8\text{O}_8(\mu_2\text{-O})_8(\mu_2\text{-OH})_8(3\text{-apz})_4]_2 \cdot 26\text{H}_2\text{O}$  (1).

| Atom–Atom | Distances/Å | Atom–Atom | Distances/Å |
|-----------|-------------|-----------|-------------|
| Mo01–Mo06 | 2.575(2)    | Mo0E–O010 | 1.961(1)    |
| Mo01–O00I | 2.153(1)    | Mo0E–O014 | 1.947(1)    |
| Mo01–O00S | 2.194(1)    | Mo0E–O017 | 2.194(1)    |
| Mo01–O00T | 1.959(1)    | Mo0E–O02D | 1.663(1)    |
| Mo01–O012 | 1.939(1)    | Mo0E–N02J | 2.184(2)    |
| Mo01–N01V | 2.170(1)    | Mo0F–Mo0G | 2.566(2)    |
| Mo01–O026 | 1.710(1)    | Mo0F–O00H | 2.099(1)    |
| Mo02–Mo03 | 2.577(2)    | Mo0F–O00J | 1.977(1)    |
| Mo02–O00L | 1.952(9)    | Mo0F–O015 | 2.180(1)    |
| Mo02–O00M | 1.940(1)    | Mo0F–O01E | 1.929(1)    |
| Mo02–O00N | 2.184(9)    | Mo0F–N01H | 2.214(1)    |
| Mo02–O00P | 2.099(1)    | Mo0F–O01N | 1.729(1)    |
| Mo02–O01M | 1.708(1)    | Mo0G–O00J | 1.960(1)    |
| Mo02–N023 | 2.165(1)    | Mo0G–O016 | 2.190(1)    |
| Mo03–O00L | 1.939(1)    | Mo0G–O018 | 2.148(1)    |
| Mo03–O00M | 1.949(9)    | Mo0G–O01E | 1.979(1)    |
| Mo03–O00Q | 2.101(1)    | Mo0G–N01T | 2.149(1)    |
| Mo03–O011 | 2.186(1)    | Mo0G–O020 | 1.697(1)    |
| Mo03–O01G | 1.683(1)    | O00J–Na3  | 3.017(2)    |
| Mo03–N01L | 2.206(1)    | O00K–Na21 | 2.941(2)    |
| Mo04–Mo05 | 2.570(2)    | O00N–Na1  | 2.458(2)    |
| Mo04–O00N | 2.151(1)    | O00N–Na21 | 2.901(3)    |
| Mo04–O00P | 2.109(1)    | O00R–Na21 | 2.812(3)    |
| Mo04–O00R | 1.978(9)    | O00S–Na3  | 2.595(1)    |
| Mo04–O01J | 1.951(1)    | O00V–Na3  | 2.407(2)    |
| Mo04–O01Q | 1.724(1)    | O00W–Na1  | 2.382(2)    |
| Mo04–N01Y | 2.153(1)    | O00W–Na21 | 2.851(3)    |
| Mo05–O00O | 2.145(1)    | O011–Na1  | 2.424(2)    |
| Mo05–O00R | 1.991(1)    | O011–Na21 | 2.971(3)    |
| Mo05–O00W | 2.146(1)    | O015–Na3  | 2.435(1)    |
| Mo05–N01C | 2.154(1)    | O016–Na3  | 2.398(2)    |
| Mo05–O01J | 1.952(1)    | O017–Na1  | 2.416(2)    |
| Mo05–O01R | 1.690(1)    | O017–Na21 | 2.971(3)    |
| Mo06–O00T | 1.976(9)    | N01C–N01O | 1.431(2)    |
| Mo06–O00V | 2.165(1)    | N01C–C02Y | 1.291(2)    |
| Mo06–O00X | 2.095(1)    | N01H–N029 | 1.341(2)    |
| Mo06–O012 | 1.949(1)    | N01H–C039 | 1.301(2)    |
| Mo06–N01U | 2.170(1)    | N01I–N01V | 1.407(2)    |
| Mo06–O028 | 1.675(1)    | N01I–C03D | 1.312(2)    |
| Mo07–Mo0D | 2.574(2)    | N01L–N01P | 1.392(2)    |
| Mo07–O00I | 2.074(1)    | N01L–C02B | 1.262(2)    |
| Mo07–O00S | 2.161(1)    | N01O–C034 | 1.322(2)    |
| Mo07–O00Z | 1.964(1)    | N01P–C02G | 1.341(2)    |

|           |          |           |          |
|-----------|----------|-----------|----------|
| Mo07-O019 | 1.697(1) | N01T-N02M | 1.421(2) |
| Mo07-O01F | 1.967(1) | N01T-C03M | 1.342(2) |
| Mo07-N01I | 2.195(1) | N01U-N025 | 1.404(2) |
| Mo08-Mo0A | 2.575(2) | N01U-C03E | 1.295(2) |
| Mo08-O00K | 1.933(9) | N01V-C02I | 1.284(2) |
| Mo08-O00U | 2.122(1) | N01Y-N023 | 1.380(2) |
| Mo08-O013 | 1.914(1) | N01Y-C02K | 1.321(2) |
| Mo08-O017 | 2.160(1) | N01Z-C02K | 1.398(2) |
| Mo08-O01K | 1.666(1) | N023-C02A | 1.408(2) |
| Mo08-N024 | 2.180(1) | N024-N02J | 1.379(2) |
| Mo09-Mo0C | 2.566(2) | N024-C02T | 1.334(2) |
| Mo09-O00V | 2.202(1) | N025-C02X | 1.354(2) |
| Mo09-O00X | 2.131(1) | C027-C02B | 1.384(3) |
| Mo09-O00Y | 1.958(1) | C027-C02G | 1.441(3) |
| Mo09-O01A | 1.923(1) | N029-C03J | 1.341(2) |
| Mo09-O01W | 1.703(1) | C02A-C02F | 1.387(2) |
| Mo09-N025 | 2.164(1) | C02F-C02K | 1.362(2) |
| Mo0A-O00K | 1.966(9) | C02G-N02H | 1.357(2) |
| Mo0A-O00O | 2.115(1) | C02I-C02Z | 1.293(3) |
| Mo0A-O00W | 2.179(1) | C02I-N13  | 1.481(4) |
| Mo0A-O013 | 1.954(1) | N02J-C03F | 1.301(3) |
| Mo0A-N01O | 2.180(1) | N02L-C02X | 1.395(2) |
| Mo0A-O022 | 1.674(1) | N02M-C03Z | 1.314(2) |
| Mo0B-Mo0E | 2.562(2) | C02T-C03V | 1.411(3) |
| Mo0B-O00Q | 2.098(1) | C02T-N1   | 1.332(4) |
| Mo0B-O010 | 1.957(1) | C02X-C035 | 1.401(3) |
| Mo0B-O011 | 2.206(1) | C02Y-C032 | 1.411(2) |
| Mo0B-O014 | 1.995(1) | C02Y-N036 | 1.391(2) |
| Mo0B-N01P | 2.157(1) | C02Z-C03D | 1.291(3) |
| Mo0B-O01X | 1.634(1) | N031-C03Z | 1.461(3) |
| Mo0C-O00H | 2.126(1) | C032-C034 | 1.421(3) |
| Mo0C-O00Y | 1.946(1) | C035-C03E | 1.461(3) |
| Mo0C-O015 | 2.184(1) | C039-C03G | 1.372(3) |
| Mo0C-O01A | 1.942(1) | N03C-C03J | 1.431(3) |
| Mo0C-O021 | 1.707(1) | C03D-N11  | 1.342(4) |
| Mo0C-N029 | 2.174(1) | C03F-C03V | 1.291(3) |
| Mo0D-O00Z | 1.942(1) | C03F-N17  | 1.232(5) |
| Mo0D-O016 | 2.198(1) | C03G-C03J | 1.371(3) |
| Mo0D-O018 | 2.126(1) | C03L-C03M | 1.441(3) |
| Mo0D-O01F | 1.976(1) | C03L-C03Z | 1.331(3) |
| Mo0D-O02C | 1.729(1) | Na3-O2    | 2.271(2) |
| Mo0D-N02M | 2.198(2) | Na1-O2    | 2.401(2) |
| Mo0E-O00U | 2.130(1) | O2-Na21   | 1.431(3) |

---

**Table S4.** Selected hydrogen bond distances (Å) and angles (°) in  $\text{Na}_8[\text{Mo}_8\text{O}_8(\mu_2\text{-O})_8(\mu_2\text{-OH})_8(3\text{-apz})_4]_2 \cdot 26\text{H}_2\text{O}$  (**1**).

|       | D–H···A         | D–H(Å) | H···A(Å) | D···A(Å) | D–H···A(°) |
|-------|-----------------|--------|----------|----------|------------|
|       | O4–H4···O27     | 0.86   | 1.87     | 2.683(8) | 157        |
|       | N11–H11A···O19  | 0.88   | 2.52     | 2.962(8) | 111        |
|       | N11–H11B···O29  | 0.88   | 2.35     | 3.212(8) | 168        |
| Intra | O8–H8···O31     | 0.86   | 1.88     | 2.627(6) | 145        |
| Intra | O11–H11···N2    | 0.86   | 1.91     | 2.671(6) | 146        |
|       | C02A–H02A···O43 | 0.95   | 2.33     | 3.248(2) | 162        |
| Intra | C02Z–H02Z···O46 | 0.95   | 2.54     | 3.269(9) | 133        |
| Intra | O15–H15···N7    | 0.85   | 1.91     | 2.479(6) | 123        |
| Intra | O15–H15···N19   | 0.85   | 1.88     | 2.461(6) | 124        |

Symmetry codes: (a)  $x, -1 + y, z$ ; (b)  $1 - x, 1 - y, 1 - z$ .

**Table S5** Selected bond distances (Å) in  $K_8[Mo_8O_8(\mu_2-O)_8(\mu_2-OH)_8(3-apz)_4]_2 \cdot 7H_2O$  (2).

| Atom–Atom | Distances/Å | Atom–Atom | Distances/Å |
|-----------|-------------|-----------|-------------|
| Mo1–Mo8   | 2.554(8)    | Mo8–O39   | 2.178(5)    |
| Mo1–K6    | 4.076(8)    | Mo8–N8    | 2.179(6)    |
| Mo1–K7    | 3.896(5)    | Mo9–Mo10  | 2.564(8)    |
| Mo1–O2    | 2.148(5)    | Mo9–K7A   | 3.901(3)    |
| Mo1–O5    | 1.960(4)    | Mo9–O14   | 2.172(5)    |
| Mo1–O13   | 1.942(5)    | Mo9–O17   | 1.948(5)    |
| Mo1–O27   | 1.701(5)    | Mo9–O40   | 2.116(5)    |
| Mo1–O49   | 2.112(5)    | Mo9–O43   | 1.954(4)    |
| Mo1–N10   | 2.165(6)    | Mo9–O50   | 1.695(5)    |
| Mo2–Mo3   | 2.561(8)    | Mo9–N14   | 2.190(6)    |
| Mo2–K3    | 4.111(4)    | Mo10–K7A  | 4.109(4)    |
| Mo2–O2    | 2.160(5)    | Mo10–O6   | 2.107(5)    |
| Mo2–O29   | 1.939(5)    | Mo10–O9   | 2.201(4)    |
| Mo2–O32   | 1.707(6)    | Mo10–O17  | 1.948(5)    |
| Mo2–O48   | 1.957(4)    | Mo10–O24  | 1.702(5)    |
| Mo2–O49   | 2.100(5)    | Mo10–O43  | 1.963(5)    |
| Mo2–N4    | 2.185(6)    | Mo10–N5   | 2.187(6)    |
| Mo3–K61   | 3.834(9)    | Mo11–Mo12 | 2.561(7)    |
| Mo3–O3    | 2.172(5)    | Mo11–K51  | 4.115(4)    |
| Mo3–O29   | 1.931(5)    | Mo11–K61  | 3.909(8)    |
| Mo3–O44   | 2.112(5)    | Mo11–O4   | 1.963(5)    |
| Mo3–O48   | 1.957(5)    | Mo11–O6   | 2.127(4)    |
| Mo3–O55   | 1.703(5)    | Mo11–O9   | 2.166(5)    |
| Mo3–N7    | 2.176(6)    | Mo11–O12  | 1.953(4)    |
| Mo4–Mo5   | 2.576(9)    | Mo11–O25  | 1.698(5)    |
| Mo4–O3    | 2.199(5)    | Mo11–N2   | 2.165(6)    |
| Mo4–O5    | 2.195(3)    | Mo12–O4   | 1.950(4)    |
| Mo4–O21   | 1.956(5)    | Mo12–O8   | 2.153(5)    |
| Mo4–O31   | 1.697(5)    | Mo12–O12  | 1.945(5)    |
| Mo4–O44   | 2.101(5)    | Mo12–O1A  | 2.113(5)    |
| Mo4–O47   | 1.952(5)    | Mo12–O23  | 1.702(5)    |
| Mo4–N12   | 2.188(6)    | Mo12–N9   | 2.189(6)    |
| Mo5–O19   | 2.112(5)    | Mo13–Mo14 | 2.567(8)    |
| Mo5–O21   | 1.959(5)    | Mo13–O8   | 2.151(4)    |
| Mo5–O41   | 2.198(5)    | Mo13–O15  | 1.951(5)    |
| Mo5–O47   | 1.973(5)    | Mo13–O1A  | 2.119(5)    |
| Mo5–O51   | 1.693(5)    | Mo13–O42  | 1.955(5)    |
| Mo5–N15   | 2.181(7)    | Mo13–O52  | 1.693(5)    |
| Mo6–Mo7   | 2.568(8)    | Mo13–N3   | 2.190(6)    |
| Mo6–O11   | 1.954(5)    | Mo14–K32  | 3.976(3)    |
| Mo6–O18   | 1.951(5)    | Mo14–K8   | 4.128(2)    |
| Mo6–O19   | 2.103(5)    | Mo14–O15  | 1.954(5)    |
| Mo6–O41   | 2.211(5)    | Mo14–O16  | 2.103(5)    |
| Mo6–O54   | 1.705(5)    | Mo14–O42  | 1.960(4)    |

|          |          |           |          |
|----------|----------|-----------|----------|
| Mo6-N16  | 2.153(6) | Mo14-O45  | 2.157(4) |
| Mo7-O1   | 2.091(5) | Mo14-N13  | 2.185(6) |
| Mo7-O11  | 1.967(5) | Mo15-Mo16 | 2.558(7) |
| Mo7-O18  | 1.952(5) | Mo15-K8   | 3.744(9) |
| Mo7-O28  | 1.703(5) | Mo15-K8A  | 3.927(4) |
| Mo7-O39  | 2.180(4) | Mo15-O7   | 1.956(4) |
| Mo7-N11  | 2.186(6) | Mo15-O16  | 2.101(5) |
| Mo8-O1   | 2.111(4) | Mo15-O20  | 1.700(5) |
| Mo8-O5   | 1.956(5) | Mo15-O45  | 2.185(5) |
| Mo8-O13  | 1.945(4) | Mo15-O46  | 1.940(5) |
| Mo16-O46 | 1.949(5) | Mo15-N1   | 2.176(6) |
| Mo16-O53 | 1.688(5) | Mo16-O7   | 1.961(5) |
| Mo16-N6  | 2.151(6) | Mo16-O14  | 2.189(5) |
| Mo16-O46 | 1.949(5) | Mo16-O40  | 2.100(5) |

---



**Table S6.** Selected bond angles (°) in  $K_8[Mo_8O_8(\mu_2-O)_8(\mu_2-OH)_8(3-apz)_4]_2 \cdot 7H_2O$  (2).

| Atom–Atom   | Angle/°   | Atom–Atom     | Angle/°   |
|-------------|-----------|---------------|-----------|
| Mo8–Mo1–K6  | 73.09(3)  | O50–Mo9–K7A   | 30.2(2)   |
| Mo8–Mo1–K7  | 130.86(8) | O50–Mo9–O14   | 160.8(2)  |
| K7–Mo1–K6   | 64.98(1)  | O50–Mo9–O17   | 104.6(2)  |
| O2–Mo1–Mo8  | 99.94(2)  | O50–Mo9–O40   | 93.9(2)   |
| O2–Mo1–K6   | 170.86(3) | O50–Mo9–O43   | 104.9(2)  |
| O2–Mo1–K7   | 123.84(6) | O50–Mo9–N14   | 90.0(2)   |
| O2–Mo1–N10  | 75.5(2)   | N14–Mo9–Mo10  | 138.32(6) |
| O5–Mo1–Mo8  | 49.20(4)  | N14–Mo9–K7A   | 120.20(8) |
| O5–Mo1–K6   | 92.73(4)  | Mo9–Mo10–K7A  | 66.96(6)  |
| O5–Mo1–K7   | 107.45(5) | O6–Mo10–Mo9   | 136.50(3) |
| O5–Mo1–O2   | 86.79(7)  | O6–Mo10–K7A   | 106.61(4) |
| O5–Mo1–O49  | 87.25(8)  | O6–Mo10–O9    | 71.29(6)  |
| O5–Mo1–N10  | 162.1(2)  | O6–Mo10–N5    | 82.2(2)   |
| O13–Mo1–Mo8 | 48.95(3)  | O9–Mo10–Mo9   | 97.21(2)  |
| O13–Mo1–K6  | 82.97(4)  | O9–Mo10–K7A   | 155.48(3) |
| O13–Mo1–K7  | 140.98(7) | O17–Mo10–Mo9  | 48.81(4)  |
| O13–Mo1–O2  | 87.97(9)  | O17–Mo10–K7A  | 95.70(6)  |
| O13–Mo1–O5  | 95.16(9)  | O17–Mo10–O6   | 157.03(8) |
| O13–Mo1–O49 | 159.54(9) | O17–Mo10–O9   | 86.17(8)  |
| O13–Mo1–N10 | 87.1(2)   | O17–Mo10–O43  | 95.03(9)  |
| O27–Mo1–Mo8 | 100.57(8) | O17–Mo10–N5   | 88.4(2)   |
| O27–Mo1–K6  | 28.14(8)  | O24–Mo10–Mo9  | 99.70(8)  |
| O27–Mo1–K7  | 37.9(2)   | O24–Mo10–K7A  | 37.70(8)  |
| O27–Mo1–O2  | 159.5(2)  | O24–Mo10–O6   | 95.8(2)   |
| O27–Mo1–O5  | 106.7(2)  | O24–Mo10–O9   | 163.1(2)  |
| O27–Mo1–O13 | 105.6(2)  | O24–Mo10–O17  | 105.3(2)  |
| O27–Mo1–O49 | 93.0(2)   | O24–Mo10–O43  | 105.1(2)  |
| O27–Mo1–N10 | 89.6(2)   | O24–Mo10–N5   | 91.2(2)   |
| O49–Mo1–Mo8 | 136.42(2) | O43–Mo10–Mo9  | 48.94(3)  |
| O49–Mo1–K6  | 117.26(3) | O43–Mo10–K7A  | 69.65(4)  |
| O49–Mo1–K7  | 55.62(6)  | O43–Mo10–O6   | 87.83(8)  |
| O49–Mo1–O2  | 71.85(8)  | O43–Mo10–O9   | 85.83(8)  |
| O49–Mo1–N10 | 84.6(2)   | O43–Mo10–N5   | 161.8(2)  |
| N10–Mo1–Mo8 | 136.08(7) | N5–Mo10–Mo9   | 137.24(5) |
| N10–Mo1–K6  | 105.17(6) | N5–Mo10–K7A   | 127.90(5) |
| N10–Mo1–K7  | 80.86(7)  | N5–Mo10–O9    | 76.52(9)  |
| Mo3–Mo2–K3  | 112.32(6) | Mo12–Mo11–K51 | 140.75(6) |
| O2–Mo2–Mo3  | 97.50(2)  | Mo12–Mo11–K61 | 77.30(3)  |
| O2–Mo2–K3   | 146.64(3) | K61–Mo11–K51  | 65.34(7)  |
| O2–Mo2–N4   | 76.7(2)   | O4–Mo11–Mo12  | 48.90(3)  |
| O29–Mo2–Mo3 | 48.43(5)  | O4–Mo11–K51   | 104.37(4) |
| O29–Mo2–K3  | 123.74(7) | O4–Mo11–K61   | 70.21(4)  |
| O29–Mo2–O2  | 87.0(2)   | O4–Mo11–O6    | 86.42(8)  |

|             |           |               |           |
|-------------|-----------|---------------|-----------|
| O29–Mo2–O48 | 95.1(2)   | O4–Mo11–O9    | 86.51(8)  |
| O29–Mo2–O49 | 158.5(2)  | O4–Mo11–N2    | 161.1(2)  |
| O29–Mo2–N4  | 88.3(2)   | O6–Mo11–Mo12  | 135.31(3) |
| O32–Mo2–Mo3 | 99.84(9)  | O6–Mo11–K51   | 38.44(3)  |
| O32–Mo2–K3  | 19.5(2)   | O6–Mo11–K61   | 89.66(3)  |
| O32–Mo2–O2  | 162.7(2)  | O6–Mo11–O9    | 71.61(7)  |
| O32–Mo2–O29 | 104.2(3)  | O6–Mo11–N2    | 84.7(2)   |
| O32–Mo2–O48 | 105.6(2)  | O9–Mo11–Mo12  | 100.43(2) |
| O32–Mo2–O49 | 95.6(2)   | O9–Mo11–K51   | 106.41(3) |
| O32–Mo2–N4  | 90.3(3)   | O9–Mo11–K61   | 151.17(2) |
| O48–Mo2–Mo3 | 49.13(3)  | O12–Mo11–Mo12 | 48.79(4)  |
| O48–Mo2–K3  | 101.85(4) | O12–Mo11–K51  | 155.07(5) |
| O48–Mo2–O2  | 86.16(8)  | O12–Mo11–K61  | 108.23(4) |
| O48–Mo2–O49 | 87.47(8)  | O12–Mo11–O4   | 95.03(9)  |
| O48–Mo2–N4  | 162.3(2)  | O12–Mo11–O6   | 161.49(9) |
| O49–Mo2–Mo3 | 136.39(2) | O12–Mo11–O9   | 90.03(8)  |
| O49–Mo2–K3  | 76.19(4)  | O12–Mo11–N2   | 88.3(2)   |
| O49–Mo2–O2  | 71.84(8)  | O25–Mo11–Mo12 | 100.55(7) |
| O49–Mo2–N4  | 83.2(2)   | O25–Mo11–K51  | 54.69(8)  |
| N4–Mo2–Mo3  | 136.73(6) | O25–Mo11–K61  | 35.95(8)  |
| N4–Mo2–K3   | 90.49(7)  | O25–Mo11–O4   | 106.2(2)  |
| Mo2–Mo3–K61 | 137.87(4) | O25–Mo11–O6   | 92.1(2)   |
| O3–Mo3–Mo2  | 100.20(3) | O25–Mo11–O9   | 159.0(2)  |
| O3–Mo3–K61  | 111.15(3) | O25–Mo11–O12  | 105.1(2)  |
| O3–Mo3–N7   | 75.6(2)   | O25–Mo11–N2   | 90.8(2)   |
| O29–Mo3–Mo2 | 48.69(5)  | N2–Mo11–Mo12  | 137.07(6) |
| O29–Mo3–K61 | 153.12(5) | N2–Mo11–K51   | 78.43(6)  |
| O29–Mo3–O3  | 88.5(2)   | N2–Mo11–K61   | 126.26(6) |
| O29–Mo3–O44 | 159.3(2)  | N2–Mo11–O9    | 74.89(9)  |
| O29–Mo3–O48 | 95.3(2)   | O4–Mo12–Mo11  | 49.32(4)  |
| O29–Mo3–N7  | 88.1(2)   | O4–Mo12–O8    | 87.94(8)  |
| O44–Mo3–Mo2 | 136.20(3) | O4–Mo12–O1A   | 87.88(9)  |
| O44–Mo3–K61 | 43.00(4)  | O4–Mo12–N9    | 163.7(2)  |
| O44–Mo3–O3  | 71.04(8)  | O8–Mo12–Mo11  | 98.74(2)  |
| O44–Mo3–N7  | 84.0(2)   | O8–Mo12–N9    | 77.38(9)  |
| O48–Mo3–Mo2 | 49.11(3)  | O12–Mo12–Mo11 | 49.05(3)  |
| O48–Mo3–K61 | 103.17(3) | O12–Mo12–O4   | 95.68(9)  |
| O48–Mo3–O3  | 88.30(8)  | O12–Mo12–O8   | 86.16(9)  |
| O48–Mo3–O44 | 87.23(8)  | O12–Mo12–O1A  | 157.17(9) |
| O48–Mo3–N7  | 163.4(2)  | O12–Mo12–N9   | 90.5(2)   |
| O55–Mo3–Mo2 | 100.57(8) | O1A–Mo12–Mo11 | 136.95(3) |
| O55–Mo3–K61 | 50.68(9)  | O1A–Mo12–O8   | 71.41(7)  |
| O55–Mo3–O3  | 159.2(2)  | O1A–Mo12–N9   | 80.8(2)   |
| O55–Mo3–O29 | 105.9(2)  | O23–Mo12–Mo11 | 99.39(7)  |
| O55–Mo3–O44 | 93.2(2)   | O23–Mo12–O4   | 104.2(2)  |
| O55–Mo3–O48 | 104.8(2)  | O23–Mo12–O8   | 161.9(2)  |
| O55–Mo3–N7  | 89.7(3)   | O23–Mo12–O12  | 105.7(2)  |
| N7–Mo3–Mo2  | 136.82(6) | O23–Mo12–O1A  | 95.2(2)   |

---

|             |           |               |           |
|-------------|-----------|---------------|-----------|
| N7–Mo3–K61  | 79.71(7)  | O23–Mo12–N9   | 88.6(2)   |
| O3–Mo4–Mo5  | 98.24(2)  | N9–Mo12–Mo11  | 139.47(6) |
| O21–Mo4–Mo5 | 48.89(4)  | O8–Mo13–Mo14  | 100.96(2) |
| O21–Mo4–O3  | 86.28(9)  | O8–Mo13–N3    | 76.47(9)  |
| O21–Mo4–O44 | 156.78(9) | O15–Mo13–Mo14 | 48.95(5)  |
| O21–Mo4–N12 | 88.6(2)   | O15–Mo13–O8   | 87.69(8)  |
| O31–Mo4–Mo5 | 100.9(2)  | O15–Mo13–O1A  | 158.78(9) |
| O31–Mo4–O3  | 160.9(2)  | O15–Mo13–O42  | 95.2(2)   |
| O31–Mo4–O21 | 106.0(2)  | O15–Mo13–N3   | 91.3(2)   |
| O31–Mo4–O44 | 95.5(2)   | O1A–Mo13–Mo14 | 136.87(3) |
| O31–Mo4–O47 | 105.8(2)  | O1A–Mo13–O8   | 71.35(7)  |
| O31–Mo4–N12 | 89.7(2)   | O1A–Mo13–N3   | 80.8(2)   |
| O44–Mo4–Mo5 | 135.71(3) | O42–Mo13–Mo14 | 49.10(3)  |
| O44–Mo4–O3  | 70.72(8)  | O42–Mo13–O8   | 89.01(8)  |
| O44–Mo4–N12 | 82.8(2)   | O42–Mo13–O1A  | 87.87(9)  |
| O47–Mo4–Mo5 | 49.33(4)  | O42–Mo13–N3   | 163.8(2)  |
| O47–Mo4–O3  | 87.04(8)  | O52–Mo13–Mo14 | 98.6(2)   |
| O47–Mo4–O21 | 95.5(2)   | O52–Mo13–O8   | 160.5(2)  |
| O47–Mo4–O44 | 86.69(9)  | O52–Mo13–O15  | 105.0(2)  |
| O47–Mo4–N12 | 162.0(2)  | O52–Mo13–O1A  | 94.5(2)   |
| N12–Mo4–Mo5 | 137.52(8) | O52–Mo13–O42  | 104.3(2)  |
| N12–Mo4–O3  | 75.8(2)   | O52–Mo13–N3   | 88.2(2)   |
| O19–Mo5–Mo4 | 136.15(3) | N3–Mo13–Mo14  | 140.18(5) |
| O19–Mo5–O41 | 71.09(7)  | Mo13–Mo14–K32 | 119.46(7) |
| O19–Mo5–N15 | 83.6(2)   | Mo13–Mo14–K8  | 153.40(5) |
| O21–Mo5–Mo4 | 48.81(6)  | K32–Mo14–K8   | 39.35(5)  |
| O21–Mo5–O19 | 159.6(2)  | O15–Mo14–Mo13 | 48.85(4)  |
| O21–Mo5–O41 | 88.9(2)   | O15–Mo14–K32  | 129.29(5) |
| O21–Mo5–O47 | 94.8(2)   | O15–Mo14–K8   | 151.5(2)  |
| O21–Mo5–N15 | 87.3(2)   | O15–Mo14–O16  | 159.69(9) |
| O41–Mo5–Mo4 | 98.72(3)  | O15–Mo14–O42  | 95.0(2)   |
| O47–Mo5–Mo4 | 48.64(4)  | O15–Mo14–O45  | 87.84(9)  |
| O47–Mo5–O19 | 87.59(9)  | O15–Mo14–N13  | 90.4(2)   |
| O47–Mo5–O41 | 85.26(8)  | O16–Mo14–Mo13 | 135.67(2) |
| O47–Mo5–N15 | 159.2(2)  | O16–Mo14–K32  | 68.90(4)  |
| O51–Mo5–Mo4 | 100.3(2)  | O16–Mo14–K8   | 36.4(2)   |
| O51–Mo5–O19 | 93.6(2)   | O16–Mo14–O45  | 72.03(7)  |
| O51–Mo5–O21 | 105.1(2)  | O16–Mo14–N13  | 82.4(2)   |
| O51–Mo5–O41 | 160.9(2)  | O26–Mo14–Mo13 | 99.08(9)  |
| O51–Mo5–O47 | 106.0(2)  | O26–Mo14–K32  | 26.1(2)   |
| O51–Mo5–N15 | 93.4(3)   | O26–Mo14–K8   | 64.3(2)   |
| N15–Mo5–Mo4 | 136.03(7) | O26–Mo14–O15  | 104.1(2)  |
| N15–Mo5–O41 | 74.0(2)   | O26–Mo14–O16  | 94.8(2)   |
| O11–Mo6–Mo7 | 49.28(4)  | O26–Mo14–O42  | 105.8(2)  |
| O11–Mo6–O19 | 88.20(9)  | O26–Mo14–O45  | 161.5(2)  |
| O11–Mo6–O41 | 84.20(8)  | O26–Mo14–N13  | 89.2(2)   |
| O11–Mo6–N16 | 160.3(2)  | O42–Mo14–Mo13 | 48.93(4)  |
| O18–Mo6–Mo7 | 48.87(5)  | O42–Mo14–K32  | 105.92(4) |

---

|             |           |               |           |
|-------------|-----------|---------------|-----------|
| O18–Mo6–O11 | 95.5(2)   | O42–Mo14–K8   | 113.1(2)  |
| O18–Mo6–O19 | 158.9(2)  | O42–Mo14–O16  | 86.79(8)  |
| O18–Mo6–O41 | 88.7(2)   | O42–Mo14–O45  | 86.89(7)  |
| O18–Mo6–N16 | 86.1(2)   | O42–Mo14–N13  | 162.3(2)  |
| O19–Mo6–Mo7 | 137.36(3) | O45–Mo14–Mo13 | 99.45(3)  |
| O19–Mo6–O41 | 70.99(7)  | O45–Mo14–K32  | 137.84(4) |
| O19–Mo6–N16 | 83.6(2)   | O45–Mo14–K8   | 98.55(9)  |
| O41–Mo6–Mo7 | 97.69(2)  | O45–Mo14–N13  | 76.41(9)  |
| O54–Mo6–Mo7 | 99.8(2)   | N13–Mo14–Mo13 | 139.26(7) |
| O54–Mo6–O11 | 105.4(2)  | N13–Mo14–K32  | 83.28(7)  |
| O54–Mo6–O18 | 104.8(2)  | N13–Mo14–K8   | 64.5(2)   |
| O54–Mo6–O19 | 94.2(2)   | Mo16–Mo15–K8  | 146.1(2)  |
| O54–Mo6–O41 | 162.4(2)  | Mo16–Mo15–K8A | 131.68(7) |
| O54–Mo6–N16 | 93.1(3)   | O7–Mo15–Mo16  | 49.31(3)  |
| N16–Mo6–Mo7 | 134.97(7) | O7–Mo15–K8    | 114.5(2)  |
| N16–Mo6–O41 | 76.2(2)   | O7–Mo15–K8A   | 108.58(5) |
| O1–Mo7–Mo6  | 137.25(3) | O7–Mo15–O16   | 88.13(8)  |
| O1–Mo7–O39  | 71.71(7)  | O7–Mo15–O45   | 86.75(8)  |
| O1–Mo7–N11  | 82.1(2)   | O7–Mo15–N1    | 161.8(2)  |
| O11–Mo7–Mo6 | 48.86(4)  | O16–Mo15–Mo16 | 137.35(2) |
| O11–Mo7–O1  | 88.59(9)  | O16–Mo15–K8   | 45.9(2)   |
| O11–Mo7–O39 | 86.52(8)  | O16–Mo15–K8A  | 56.41(5)  |
| O11–Mo7–N11 | 162.2(2)  | O16–Mo15–O45  | 71.50(7)  |
| O18–Mo7–Mo6 | 48.81(5)  | O16–Mo15–N1   | 82.45(9)  |
| O18–Mo7–O1  | 157.98(9) | O20–Mo15–Mo16 | 99.39(7)  |
| O18–Mo7–O11 | 95.0(2)   | O20–Mo15–K8   | 52.0(3)   |
| O18–Mo7–O39 | 86.82(9)  | O20–Mo15–K8A  | 38.28(8)  |
| O18–Mo7–N11 | 88.3(2)   | O20–Mo15–O7   | 104.9(2)  |
| O28–Mo7–Mo6 | 100.3(2)  | O20–Mo15–O16  | 93.7(2)   |
| O28–Mo7–O1  | 95.0(2)   | O20–Mo15–O45  | 161.1(2)  |
| O28–Mo7–O11 | 106.0(2)  | O20–Mo15–O46  | 105.0(2)  |
| O28–Mo7–O18 | 104.8(3)  | O20–Mo15–N1   | 91.2(2)   |
| O28–Mo7–O39 | 161.8(2)  | O45–Mo15–Mo16 | 99.47(2)  |
| O28–Mo7–N11 | 89.9(2)   | O45–Mo15–K8   | 109.8(2)  |
| O39–Mo7–Mo6 | 97.97(2)  | O45–Mo15–K8A  | 124.18(4) |
| O39–Mo7–N11 | 76.24(9)  | O46–Mo15–Mo16 | 49.03(4)  |
| N11–Mo7–Mo6 | 137.09(6) | O46–Mo15–K8   | 145.1(2)  |
| O1–Mo8–Mo1  | 135.79(3) | O46–Mo15–K8A  | 139.51(6) |
| O1–Mo8–O39  | 71.37(7)  | O46–Mo15–O7   | 95.61(9)  |
| O1–Mo8–N8   | 83.7(2)   | O46–Mo15–O16  | 159.16(9) |
| O5–Mo8–Mo1  | 49.34(3)  | O46–Mo15–O45  | 88.20(9)  |
| O5–Mo8–O1   | 86.53(8)  | O46–Mo15–N1   | 88.0(2)   |
| O5–Mo8–O39  | 87.17(8)  | N1–Mo15–Mo16  | 137.05(5) |
| O5–Mo8–N8   | 161.9(2)  | N1–Mo15–K8    | 69.0(2)   |
| O13–Mo8–Mo1 | 48.86(5)  | N1–Mo15–K8A   | 78.95(7)  |
| O13–Mo8–O1  | 158.86(9) | N1–Mo15–O45   | 75.55(9)  |
| O13–Mo8–O5  | 95.20(9)  | O7–Mo16–Mo15  | 49.14(3)  |
| O13–Mo8–O39 | 87.65(8)  | O7–Mo16–O14   | 85.13(8)  |

|              |           |               |           |
|--------------|-----------|---------------|-----------|
| O13–Mo8–N8   | 88.5(2)   | O7–Mo16–O40   | 87.38(8)  |
| O22–Mo8–Mo1  | 99.96(8)  | O7–Mo16–N6    | 160.7(2)  |
| O22–Mo8–O1   | 94.0(2)   | O14–Mo16–Mo15 | 98.23(2)  |
| O22–Mo8–O5   | 105.9(2)  | O40–Mo16–Mo15 | 136.42(3) |
| O22–Mo8–O13  | 105.7(2)  | O40–Mo16–O14  | 71.35(7)  |
| O22–Mo8–O39  | 160.1(2)  | O40–Mo16–N6   | 83.8(2)   |
| O22–Mo8–N8   | 90.0(2)   | O46–Mo16–Mo15 | 48.72(4)  |
| O39–Mo8–Mo1  | 99.98(2)  | O46–Mo16–O7   | 95.15(9)  |
| O39–Mo8–N8   | 75.2(2)   | O46–Mo16–O14  | 88.29(9)  |
| N8–Mo8–Mo1   | 137.39(5) | O46–Mo16–O40  | 159.23(9) |
| Mo10–Mo9–K7A | 75.81(7)  | O46–Mo16–N6   | 87.3(2)   |
| O14–Mo9–Mo10 | 100.18(3) | O53–Mo16–Mo15 | 100.17(8) |
| O14–Mo9–K7A  | 159.83(4) | O53–Mo16–O7   | 106.0(2)  |
| O14–Mo9–N14  | 76.1(2)   | O53–Mo16–O14  | 161.5(2)  |
| O17–Mo9–Mo10 | 48.84(4)  | O53–Mo16–O40  | 94.0(2)   |
| O17–Mo9–K7A  | 102.41(5) | O53–Mo16–O46  | 105.0(2)  |
| O17–Mo9–O14  | 88.72(9)  | O53–Mo16–N6   | 91.8(3)   |
| O17–Mo9–O40  | 159.80(9) | N6–Mo16–Mo15  | 136.04(6) |
| O17–Mo9–O43  | 95.35(9)  | N6–Mo16–O14   | 75.8(2)   |
| O17–Mo9–N14  | 89.5(2)   | O43–Mo9–O40   | 87.45(8)  |
| O40–Mo9–Mo10 | 136.64(3) | O43–Mo9–N14   | 162.5(2)  |
| O40–Mo9–N14  | 82.4(2)   | O50–Mo9–Mo10  | 99.03(9)  |
| O43–Mo9–Mo10 | 49.25(4)  | O43–Mo9–Mo10  | 49.25(4)  |
| O43–Mo9–K7A  | 75.17(5)  | O43–Mo9–K7A   | 75.17(5)  |
| O40–Mo9–O14  | 71.41(7)  |               |           |

---

**Table S7.** Selected hydrogen bond distances (Å) and angles (°) in  $\text{K}_8[\text{Mo}_8\text{O}_8(\mu_2\text{-O})_8(\mu_2\text{-OH})_8(3\text{-apz})_4]_2 \cdot 7\text{H}_2\text{O}$  (**2**).

|       | D–H···A        | D–H(Å) | H···A(Å) | D···A(Å)  | D–H···A(°) |
|-------|----------------|--------|----------|-----------|------------|
| Intra | O1–H1···O7     | 0.95   | 1.78     | 2.673(7)  | 155        |
| Intra | O1A–H1A···O47  | 0.85   | 1.88     | 2.702(6)  | 161        |
| Intra | O2–H2···N4     | 0.95   | 2.05     | 2.696(7)  | 124        |
| Intra | O2–H2···N10    | 0.95   | 2.00     | 2.642(7)  | 123        |
| Intra | O3–H3···N7     | 0.95   | 1.87     | 2.663(8)  | 140        |
| Intra | O3–H3···N12    | 0.95   | 1.89     | 2.695(9)  | 141        |
| Intra | O6–H6···O48    | 1.00   | 1.77     | 2.713(7)  | 156        |
| Intra | O14–H14···O6   | 0.95   | 1.82     | 2.648(7)  | 144        |
|       | N23–H23B···O24 | 0.88   | 2.60     | 3.258(12) | 132        |

**Table S8.** Selected bond distances ( Å ) and angles ( ° ) in  $(\text{NH}_4)_4[\text{Mo}_8\text{O}_8(\mu_2\text{-O})_8(\mu_2\text{-OH})_4(3\text{-apz})_8]\cdot 20.5\text{H}_2\text{O}$  (**3**).

| <b>Atom–Atom</b> | <b>Distances/Å</b> | <b>Atom–Atom</b> | <b>Distances/Å</b> |
|------------------|--------------------|------------------|--------------------|
| Mo1–Mo2          | 2.5661(2)          | Mo2–O1           | 2.164(7)           |
| Mo1–O11          | 2.173(7)           | Mo2–O22          | 1.941(6)           |
| Mo1–O22          | 1.944(6)           | Mo2–O2           | 1.941(6)           |
| Mo1–O2           | 1.944(6)           | Mo2–O4           | 1.701(7)           |
| Mo1–O3           | 1.711(7)           | Mo2–N23          | 2.156(7)           |
| Mo1–N12          | 2.169(7)           | Mo2–N24          | 2.156(7)           |
| Mo1–N1           | 2.169(7)           |                  |                    |

**Table S9.** Selected bond angles (°) in  $(\text{NH}_4)_4[\text{Mo}_8\text{O}_8(\mu_2\text{-O})_8(\mu_2\text{-OH})_4(3\text{-apz})_8]\cdot 20.5\text{H}_2\text{O}$  (**3**).

| Atom–Atom–Atom | Angle/°   | Atom–Atom–Atom | Angle/°  |
|----------------|-----------|----------------|----------|
| O11–Mo1–Mo2    | 105.41(9) | O22–Mo2–N23    | 164.6(2) |
| O22–Mo1–Mo2    | 48.62(7)  | O2–Mo2–N24     | 164.6(2) |
| O2–Mo1–Mo2     | 48.62(7)  | O4–Mo2–Mo1     | 97.6(3)  |
| O2–Mo1–O11     | 89.5(2)   | O4–Mo2–O1      | 158.4(3) |
| O22–Mo1–O11    | 89.5(2)   | O4–Mo2–O2      | 106.1(2) |
| O22–Mo1–O2     | 93.0(3)   | O4–Mo2–O22     | 106.1(2) |
| O22–Mo1–N12    | 164.0(2)  | O4–Mo2–N23     | 88.6(2)  |
| O22–Mo1–N1     | 86.2(3)   | O4–Mo2–N24     | 88.6(2)  |
| O2–Mo1–N12     | 86.2(3)   | N23–Mo2–Mo1    | 135.1(2) |
| O2–Mo1–N1      | 164.0(2)  | N24–Mo2–Mo1    | 135.1(2) |
| O3–Mo1–Mo2     | 97.0(3)   | N24–Mo2–O1     | 76.2(2)  |
| O3–Mo1–O11     | 157.6(3)  | N23–Mo2–O1     | 76.2(2)  |
| O3–Mo1–O22     | 105.7(2)  | N23–Mo2–N24    | 89.2(4)  |
| O3–Mo1–O2      | 105.7(2)  | Mo2–O1–Mo14    | 119.4(3) |
| O3–Mo1–N1      | 89.8(2)   | Mo2–O2–Mo1     | 82.7(3)  |
| O3–Mo1–N12     | 89.8(2)   | N2–N1–Mo1      | 124.3(4) |
| N12–Mo1–Mo2    | 134.56(9) | C1–N1–Mo1      | 129.0(7) |
| N1–Mo1–Mo2     | 134.56(9) | C1–N1–N2       | 106.7(7) |
| N1–Mo1–O11     | 74.56(9)  | N1–N2–Mo21     | 122.6(4) |
| N12–Mo1–O11    | 74.56(9)  | C3–N2–Mo21     | 130.9(7) |
| N12–Mo1–N1     | 90.1(4)   | O22–Mo2–O1     | 88.5(2)  |
| O1–Mo2–Mo1     | 103.97(8) | O2–Mo2–O22     | 93.2(4)  |
| O2–Mo2–Mo1     | 48.71(7)  | O2–Mo2–N23     | 86.8(3)  |
| O22–Mo2–Mo1    | 48.71(7)  | O22–Mo2–N24    | 86.8(3)  |
| O2–Mo2–O1      | 88.5(2)   |                |          |



**Table S10.** Selected hydrogen bond distances (Å) and angles (°) in  $(\text{NH}_4)_4[\text{Mo}_8\text{O}_8(\mu_2\text{-O})_8(\mu_2\text{-OH})_4(3\text{-apz})_8]\cdot 20.5\text{H}_2\text{O}$  (**3**).

|       | D–H⋯A     | D–H(Å) | H⋯A(Å) | D⋯A(Å)    | D–H⋯A(°) |
|-------|-----------|--------|--------|-----------|----------|
| Intra | O1–H1⋯N1  | 0.85   | 1.99   | 2.630(2)  | 130      |
| Intra | O1–H1⋯N2  | 0.85   | 2.05   | 2.664(2)  | 128      |
|       | N3–H3A⋯N3 | 0.88   | 2.28   | 2.961(2)  | 134      |
|       | N3–H3B⋯O3 | 0.88   | 2.48   | 3.108 (2) | 129      |
|       | N3–H3B⋯O4 | 0.88   | 2.37   | 3.184 (2) | 154      |

Symmetry codes: (a)  $x, -1 + y, z$ ; (b)  $1 + x, y, z$ ; (c)  $x, 1 + y, z$ ; (d)  $-1 + x, y, z$ ; (e)  $2 - x, 1 - y, 1 - z$ ; (f)  $1 - x, 1 - y, -z$ .

**Table S11.** Selected bond distances (Å) in  $(\text{Mo}_8\text{O}_{26})_n \cdot 4n(3\text{-H}_2\text{apz})$  (**4**).

| <b>Atom–Atom</b> | <b>Distances/Å</b> | <b>Atom–Atom</b> | <b>Distances/Å</b> |
|------------------|--------------------|------------------|--------------------|
| Mo1–O5           | 1.902(4)           | Mo3–O            | 1.903(4)           |
| Mo1–O31          | 2.229(4)           | Mo3–O12          | 1.692(5)           |
| Mo1–O91          | 2.269(5)           | Mo3–O16          | 1.726(4)           |
| Mo1–O10          | 1.890(4)           | Mo3–O42          | 2.078(4)           |
| Mo1–O2           | 1.692(5)           | Mo3–O51          | 2.125(4)           |
| Mo1–O4           | 1.776(4)           | Mo3–O61          | 2.300(4)           |
| Mo2–O5           | 2.161(4)           | Mo3–O            | 1.903(4)           |
| Mo2–O6           | 1.880(4)           | Mo3–O12          | 1.692(5)           |
| Mo2–O3           | 1.767(5)           | Mo4–O61          | 2.345(4)           |
| Mo2–O91          | 1.935(5)           | Mo4–O            | 1.923(5)           |
| Mo2–O9           | 2.421(5)           | Mo4–O91          | 2.205(5)           |
| Mo2–O13          | 1.695(5)           | Mo4–O10          | 2.003(5)           |
| Mo3–O51          | 2.125(4)           | Mo4–O15          | 1.718(5)           |
| Mo3–O61          | 2.300(4)           | Mo4–O17          | 1.703(5)           |

**Table S12.** Selected bond angles (°) in (Mo<sub>8</sub>O<sub>26</sub>)<sub>n</sub>·4n(3-H<sub>2</sub>apz) (4).

| Atom–Atom   | Angle/°   | Atom–Atom    | Angle/°   |
|-------------|-----------|--------------|-----------|
| O5–Mo1–O31  | 81.12(7)  | O–Mo4–O61    | 74.55(7)  |
| O5–Mo1–O91  | 71.69(8)  | O–Mo4–O91    | 85.93(8)  |
| O31–Mo1–O91 | 71.80(7)  | O–Mo4–O10    | 152.34(8) |
| O10–Mo1–O5  | 144.0(2)  | O91–Mo4–O61  | 73.04(6)  |
| O10–Mo1–O31 | 81.37(8)  | O10–Mo4–O61  | 82.59(7)  |
| O10–Mo1–O91 | 73.00(8)  | O10–Mo4–O91  | 72.47(7)  |
| O2–Mo1–O5   | 106.6(2)  | O15–Mo4–O61  | 87.78(9)  |
| O2–Mo1–O31  | 84.63(9)  | O15–Mo4–O    | 101.4(2)  |
| O2–Mo1–O91  | 156.4(2)  | O15–Mo4–O91  | 157.0(2)  |
| O2–Mo1–O10  | 102.8(2)  | O15–Mo4–O10  | 92.9(2)   |
| O2–Mo1–O4   | 104.5(2)  | O17–Mo4–O61  | 166.2(2)  |
| O4–Mo1–O5   | 96.05(9)  | O17–Mo4–O    | 98.0(2)   |
| O4–Mo1–O31  | 170.86(9) | O17–Mo4–O91  | 95.2(2)   |
| O4–Mo1–O91  | 99.06(9)  | O17–Mo4–O10  | 100.9(2)  |
| O4–Mo1–O10  | 96.3(2)   | O17–Mo4–O15  | 105.2(2)  |
| O5–Mo2–O9   | 80.03(6)  | Mo1–O5–Mo2   | 108.0(2)  |
| O6–Mo2–O5   | 76.56(8)  | Mo1–O5–Mo31  | 146.8(2)  |
| O6–Mo2–O91  | 143.4(2)  | Mo31–O5–Mo2  | 105.05(8) |
| O6–Mo2–O9   | 76.97(7)  | Mo2–O6–Mo31  | 108.47(9) |
| O3–Mo2–O5   | 156.20(8) | Mo2–O6–Mo41  | 111.2(2)  |
| O3–Mo2–O6   | 100.3(2)  | Mo31–O6–Mo41 | 89.25(6)  |
| O3–Mo2–O91  | 98.5(2)   | Mo3–O–Mo4    | 117.0(2)  |
| O3–Mo2–O9   | 76.29(7)  | Mo2–O3–Mo11  | 117.9(2)  |
| O91–Mo2–O5  | 73.63(8)  | Mo11–O9–Mo2  | 93.98(7)  |
| O91–Mo2–O9  | 77.4(2)   | Mo21–O9–Mo11 | 102.69(9) |
| O13–Mo2–O5  | 100.1(2)  | Mo21–O9–Mo2  | 102.6(2)  |
| O13–Mo2–O6  | 102.7(2)  | Mo21–O9–Mo41 | 151.6(3)  |
| O13–Mo2–O3  | 103.6(2)  | Mo41–O9–Mo11 | 94.96(8)  |
| O13–Mo2–O91 | 103.0(2)  | Mo41–O9–Mo2  | 98.07(7)  |
| O13–Mo2–O9  | 179.6(2)  | Mo1–O10–Mo4  | 115.8(2)  |
| O51–Mo3–O61 | 69.07(6)  | C3–N4–N5     | 108.1(6)  |
| O–Mo3–O51   | 87.76(7)  | C2–N5–N4     | 109.0(5)  |
| O–Mo3–O61   | 76.01(8)  | C26–N1–N28   | 107.9(6)  |
| O–Mo3–O42   | 157.81(9) | C24–N28–N1   | 110.1(5)  |
| O12–Mo3–O51 | 95.9(2)   | N28–C24–N29  | 122.7(6)  |
| O12–Mo3–O61 | 163.84(9) | N28–C24–C25  | 107.1(6)  |
| O12–Mo3–O   | 98.1(2)   | N29–C24–C25  | 130.2(7)  |
| O12–Mo3–O16 | 105.7(2)  | N4–C3–C22    | 109.7(6)  |
| O12–Mo3–O42 | 99.5(2)   | N5–C2–N23    | 121.7(6)  |
| O16–Mo3–O51 | 155.5(2)  | N5–C2–C22    | 108.1(6)  |
| O16–Mo3–O61 | 90.20(9)  | N23–C2–C22   | 130.2(7)  |
| O16–Mo3–O   | 100.1(2)  | C3–C22–C2    | 105.0(6)  |
| O16–Mo3–O42 | 87.98(9)  | N1–C26–C25   | 109.0(6)  |
| O42–Mo3–O51 | 77.10(7)  | C26–C25–C24  | 105.9(6)  |
| O42–Mo3–O61 | 83.40(7)  | Mo1–O4–Mo33  | 171.3(3)  |

|             |           |              |           |
|-------------|-----------|--------------|-----------|
| O5-Mo1-O31  | 81.12(7)  | O-Mo4-O61    | 74.55(7)  |
| O5-Mo1-O91  | 71.69(8)  | O-Mo4-O91    | 85.93(8)  |
| O31-Mo1-O91 | 71.80(7)  | O-Mo4-O10    | 152.34(8) |
| O10-Mo1-O5  | 144.0(2)  | O91-Mo4-O61  | 73.04(6)  |
| O10-Mo1-O31 | 81.37(8)  | O10-Mo4-O61  | 82.59(7)  |
| O10-Mo1-O91 | 73.00(8)  | O10-Mo4-O91  | 72.47(7)  |
| O2-Mo1-O5   | 106.6(2)  | O15-Mo4-O61  | 87.78(9)  |
| O2-Mo1-O31  | 84.63(9)  | O15-Mo4-O    | 101.4(2)  |
| O2-Mo1-O91  | 156.4(2)  | O15-Mo4-O91  | 157.0(2)  |
| O2-Mo1-O10  | 102.8(2)  | O15-Mo4-O10  | 92.9(2)   |
| O2-Mo1-O4   | 104.5(2)  | O17-Mo4-O61  | 166.2(2)  |
| O4-Mo1-O5   | 96.05(9)  | O17-Mo4-O    | 98.0(2)   |
| O4-Mo1-O31  | 170.86(9) | O17-Mo4-O91  | 95.2(2)   |
| O4-Mo1-O91  | 99.06(9)  | O17-Mo4-O10  | 100.9(2)  |
| O4-Mo1-O10  | 96.3(2)   | O17-Mo4-O15  | 105.2(2)  |
| O5-Mo2-O9   | 80.03(6)  | Mo1-O5-Mo2   | 108.0(2)  |
| O6-Mo2-O5   | 76.56(8)  | Mo1-O5-Mo31  | 146.8(2)  |
| O6-Mo2-O91  | 143.4(2)  | Mo31-O5-Mo2  | 105.05(8) |
| O6-Mo2-O9   | 76.97(7)  | Mo2-O6-Mo31  | 108.47(9) |
| O3-Mo2-O5   | 156.20(8) | Mo2-O6-Mo41  | 111.2(2)  |
| O3-Mo2-O6   | 100.3(2)  | Mo31-O6-Mo41 | 89.25(6)  |
| O3-Mo2-O91  | 98.5(2)   | Mo3-O-Mo4    | 117.0(2)  |
| O3-Mo2-O9   | 76.29(7)  | Mo2-O3-Mo11  | 117.9(2)  |
| O91-Mo2-O5  | 73.63(8)  | Mo11-O9-Mo2  | 93.98(7)  |
| O91-Mo2-O9  | 77.4(2)   | Mo21-O9-Mo11 | 102.69(9) |
| O13-Mo2-O5  | 100.1(2)  | Mo21-O9-Mo2  | 102.6(2)  |
| O13-Mo2-O6  | 102.7(2)  | Mo21-O9-Mo41 | 151.6(3)  |
| O13-Mo2-O3  | 103.6(2)  | Mo41-O9-Mo11 | 94.96(8)  |
| O13-Mo2-O91 | 103.0(2)  | Mo41-O9-Mo2  | 98.07(7)  |
| O13-Mo2-O9  | 179.6(2)  | Mo1-O10-Mo4  | 115.8(2)  |
| O51-Mo3-O61 | 69.07(6)  | C3-N4-N5     | 108.1(6)  |
| O-Mo3-O51   | 87.76(7)  | C2-N5-N4     | 109.0(5)  |
| O-Mo3-O61   | 76.01(8)  | C26-N1-N28   | 107.9(6)  |
| O-Mo3-O42   | 157.81(9) | C24-N28-N1   | 110.1(5)  |
| O12-Mo3-O51 | 95.9(2)   | N28-C24-N29  | 122.7(6)  |
| O12-Mo3-O61 | 163.84(9) | N28-C24-C25  | 107.1(6)  |
| O12-Mo3-O   | 98.1(2)   | N29-C24-C25  | 130.2(7)  |
| O12-Mo3-O16 | 105.7(2)  | N4-C3-C22    | 109.7(6)  |
| O12-Mo3-O42 | 99.5(2)   | N5-C2-N23    | 121.7(6)  |
| O16-Mo3-O51 | 155.5(2)  | N5-C2-C22    | 108.1(6)  |
| O16-Mo3-O61 | 90.20(9)  | N23-C2-C22   | 130.2(7)  |
| O16-Mo3-O   | 100.1(2)  | C3-C22-C2    | 105.0(6)  |
| O16-Mo3-O42 | 87.98(9)  | N1-C26-C25   | 109.0(6)  |
| O42-Mo3-O51 | 77.10(7)  | C26-C25-C24  | 105.9(6)  |
| O42-Mo3-O61 | 83.40(7)  | Mo1-O4-Mo33  | 171.3(3)  |
| O5-Mo1-O31  | 81.12(7)  | O-Mo4-O61    | 74.55(7)  |
| O5-Mo1-O91  | 71.69(18) | O-Mo4-O91    | 85.93(8)  |
| O31-Mo1-O91 | 71.80(17) | O-Mo4-O10    | 152.34(8) |

|             |           |              |           |
|-------------|-----------|--------------|-----------|
| O10–Mo1–O5  | 144.0(2)  | O91–Mo4–O61  | 73.04(6)  |
| O10–Mo1–O31 | 81.37(8)  | O10–Mo4–O61  | 82.59(7)  |
| O10–Mo1–O91 | 73.00(8)  | O10–Mo4–O91  | 72.47(7)  |
| O2–Mo1–O5   | 106.6(2)  | O15–Mo4–O61  | 87.78(9)  |
| O2–Mo1–O31  | 84.63(9)  | O15–Mo4–O    | 101.4(2)  |
| O2–Mo1–O91  | 156.4(2)  | O15–Mo4–O91  | 157.0(2)  |
| O2–Mo1–O10  | 102.8(2)  | O15–Mo4–O10  | 92.9(2)   |
| O2–Mo1–O4   | 104.5(2)  | O17–Mo4–O61  | 166.2(2)  |
| O4–Mo1–O5   | 96.05(9)  | O17–Mo4–O    | 98.0(2)   |
| O4–Mo1–O31  | 170.86(9) | O17–Mo4–O91  | 95.2(2)   |
| O4–Mo1–O91  | 99.06(9)  | O17–Mo4–O10  | 100.9(2)  |
| O4–Mo1–O10  | 96.3(2)   | O17–Mo4–O15  | 105.2(2)  |
| O5–Mo2–O9   | 80.03(6)  | Mo1–O5–Mo2   | 108.0(2)  |
| O6–Mo2–O5   | 76.56(8)  | Mo1–O5–Mo31  | 146.8(2)  |
| O6–Mo2–O91  | 143.4(2)  | Mo31–O5–Mo2  | 105.05(8) |
| O6–Mo2–O9   | 76.97(7)  | Mo2–O6–Mo31  | 108.47(9) |
| O3–Mo2–O5   | 156.20(8) | Mo2–O6–Mo41  | 111.2(2)  |
| O3–Mo2–O6   | 100.3(2)  | Mo31–O6–Mo41 | 89.25(6)  |
| O3–Mo2–O91  | 98.5(2)   | Mo3–O–Mo4    | 117.0(2)  |
| O3–Mo2–O9   | 76.29(7)  | Mo2–O3–Mo11  | 117.9(2)  |
| O91–Mo2–O5  | 73.63(8)  | Mo11–O9–Mo2  | 93.98(7)  |
| O91–Mo2–O9  | 77.4(2)   | Mo21–O9–Mo11 | 102.69(9) |
| O13–Mo2–O5  | 100.1(2)  | Mo21–O9–Mo2  | 102.6(2)  |
| O13–Mo2–O6  | 102.7(2)  | Mo21–O9–Mo41 | 151.6(3)  |
| O13–Mo2–O3  | 103.6(2)  | Mo41–O9–Mo11 | 94.96(8)  |
| O13–Mo2–O91 | 103.0(2)  | Mo41–O9–Mo2  | 98.07(7)  |
| O13–Mo2–O9  | 179.6(2)  | Mo1–O10–Mo4  | 115.8(2)  |
| O51–Mo3–O61 | 69.07(6)  | C3–N4–N5     | 108.1(6)  |
| O–Mo3–O51   | 87.76(7)  | C2–N5–N4     | 109.0(5)  |
| O–Mo3–O61   | 76.01(8)  | C26–N1–N28   | 107.9(6)  |
| O–Mo3–O42   | 157.81(9) | C24–N28–N1   | 110.1(5)  |
| O12–Mo3–O51 | 95.9(2)   | N28–C24–N29  | 122.7(6)  |
| O12–Mo3–O61 | 163.84(9) | N28–C24–C25  | 107.1(6)  |
| O12–Mo3–O   | 98.1(2)   | N29–C24–C25  | 130.2(7)  |
| O12–Mo3–O16 | 105.7(2)  | N4–C3–C22    | 109.7(6)  |
| O12–Mo3–O42 | 99.5(2)   | N5–C2–N23    | 121.7(6)  |
| O16–Mo3–O51 | 155.5(2)  | N5–C2–C22    | 108.1(6)  |
| O16–Mo3–O61 | 90.20(9)  | N23–C2–C22   | 130.2(7)  |
| O16–Mo3–O   | 100.1(2)  | C3–C22–C2    | 105.0(6)  |
| O16–Mo3–O42 | 87.98(9)  | N1–C26–C25   | 109.0(6)  |
| O42–Mo3–O51 | 77.10(7)  | C26–C25–C24  | 105.9(6)  |
| O42–Mo3–O61 | 83.40(7)  | Mo1–O4–Mo33  | 171.3(3)  |

---

**Table S13.** Selected hydrogen bond distances (Å) and angles (°) in  $(\text{Mo}_8\text{O}_{26})_n \cdot 4n(3\text{-H}_2\text{apz})$  (**4**).

|       | D-H...A                  | D-H(Å) | H...A(Å) | D...A(Å) | D-H...A(°) |
|-------|--------------------------|--------|----------|----------|------------|
| Intra | N4-H4...O16 <sup>a</sup> | 0.88   | 2.03     | 2.852(8) | 155        |
| Intra | N5-H5...O10              | 0.88   | 1.80     | 2.671(7) | 171        |
|       | N1-H1...O15 <sup>b</sup> | 0.88   | 2.07     | 2.813(8) | 142        |
|       | N28-H28...O6             | 0.88   | 1.88     | 2.740(7) | 165        |

Symmetry codes: (a)  $2 - x, 1 - y, 2 - z$ ; (b)  $-1 + x, +y, -1 + z$ ;

**Table S14.** Bond valence calculations for **1 ~ 4** respectively.

| Complexes                                                                                                                               | Atoms | N  | $\sum S_{ij}$             | $\Delta$                  |
|-----------------------------------------------------------------------------------------------------------------------------------------|-------|----|---------------------------|---------------------------|
| $\text{Na}_8[\text{Mo}_8\text{O}_8(\mu_2\text{-O})_8(\mu_2\text{-OH})_8(3\text{-apz})_4]_2 \cdot 26\text{H}_2\text{O}$ ( <b>1</b> )     | Mo1   | 5+ | <b>5.113</b>              | <b>0.113</b>              |
|                                                                                                                                         | Mo2   | 5+ | <b>5.232</b>              | <b>0.232</b>              |
|                                                                                                                                         | Mo3   | 5+ | <b>5.288</b>              | <b>0.288</b>              |
|                                                                                                                                         | Mo4   | 5+ | <b>5.264</b>              | <b>0.264</b>              |
|                                                                                                                                         | Mo5   | 5+ | <b>5.203</b>              | <b>0.203</b>              |
|                                                                                                                                         | Mo6   | 5+ | <b>5.075</b>              | <b>0.075</b>              |
|                                                                                                                                         | Mo7   | 5+ | <b>5.098</b>              | <b>0.098</b>              |
|                                                                                                                                         | Mo8   | 5+ | <b>5.263</b>              | <b>0.263</b>              |
|                                                                                                                                         |       | 5+ | <b>5.192<sub>av</sub></b> | <b>0.192<sub>av</sub></b> |
| $\text{K}_8[\text{Mo}_8\text{O}_8(\mu_2\text{-O})_8(\mu_2\text{-OH})_8(3\text{-apz})_4]_2 \cdot 7\text{H}_2\text{O}$ ( <b>2</b> )       | Mo1   | 5+ | <b>5.274</b>              | <b>0.274</b>              |
|                                                                                                                                         | Mo2   | 5+ | <b>5.225</b>              | <b>0.225</b>              |
|                                                                                                                                         | Mo3   | 5+ | <b>5.244</b>              | <b>0.244</b>              |
|                                                                                                                                         | Mo4   | 5+ | <b>5.209</b>              | <b>0.209</b>              |
|                                                                                                                                         | Mo5   | 5+ | <b>5.144</b>              | <b>0.144</b>              |
|                                                                                                                                         | Mo6   | 5+ | <b>5.199</b>              | <b>0.199</b>              |
|                                                                                                                                         | Mo7   | 5+ | <b>5.183</b>              | <b>0.183</b>              |
|                                                                                                                                         | Mo8   | 5+ | <b>5.198</b>              | <b>0.198</b>              |
|                                                                                                                                         |       | 5+ | <b>5.209<sub>av</sub></b> | <b>0.209<sub>av</sub></b> |
| $(\text{NH}_4)_4[\text{Mo}_8\text{O}_8(\mu_2\text{-O})_8(\mu_2\text{-OH})_4(3\text{-apz})_8] \cdot 20.5\text{H}_2\text{O}$ ( <b>3</b> ) | Mo1   | 5+ | <b>5.236</b>              | <b>0.236</b>              |
|                                                                                                                                         | Mo2   | 5+ | <b>5.236</b>              | <b>0.236</b>              |
|                                                                                                                                         |       | 5+ | <b>5.236<sub>av</sub></b> | <b>0.236<sub>av</sub></b> |
| $(\text{Mo}_8\text{O}_{26})_n \cdot 4n(3\text{-H}_2\text{apz})$ ( <b>4</b> )                                                            | Mo1   | 6+ | <b>6.067</b>              | <b>0.067</b>              |
|                                                                                                                                         | Mo2   | 6+ | <b>5.986</b>              | <b>0.014</b>              |
|                                                                                                                                         | Mo3   | 6+ | <b>5.965</b>              | <b>0.035</b>              |
|                                                                                                                                         | Mo4   | 6+ | <b>5.887</b>              | <b>0.113</b>              |
|                                                                                                                                         |       | 6+ | <b>5.976<sub>av</sub></b> | <b>0.976<sub>av</sub></b> |

**Table S15** Comparisons of CO<sub>2</sub> adsorption data for **1**, **2** and **3** with some typical MOFs at 1 bar, 298 K.

| Adsorbents                           | Common name | Amounts (mmol·g <sup>-1</sup> ) |
|--------------------------------------|-------------|---------------------------------|
| <b>1</b>                             | —           | 0.051                           |
| <b>2</b>                             | —           | 0.044                           |
| <b>3</b>                             | —           | 0.030                           |
| Al(OH)(bpydc) <sup>1</sup>           | MOF-253     | 1.409                           |
| Zn(nbIm)(nIm) <sup>2</sup>           | ZIF-78      | 2.068                           |
| Zn(IDC) <sup>3</sup>                 | IMOF-3      | 1.955                           |
| [Cu(tba)2] <sup>4</sup>              | —           | 1.830                           |
| [Mg(TCPBDA)] <sup>5</sup>            | —           | 1.495                           |
| Fe <sub>2</sub> (DOBDC) <sup>6</sup> | —           | 2.027                           |

List of abbreviations: H<sub>2</sub>bpydc = 2,2'-bipyridine-5,5'-dicarboxylic acid; nbIm = 5-nitrobenzimidazole, nIm = 2-nitroimidazole; IDC = 2-methylimidazolate-4-amide-5-imidate; tba = 4-(1H-1,2,4-triazol-1-yl) benzoate; TCPBDA2 = N,N,N',N' -tetrakis(4--carboxyphenyl)-b iphenyl-4'4'-diamine; DOBDC = 2,5-dioxido--1,4-benzenedicarboxylate

### References

1. E. D. Bloch, D. Britt, C. Lee, C. J. Doonan, F. J. Uribe-Romo, H. Furukawa, J. R. Long and O. M. Yaghi, *J. Am. Chem. Soc.*, 2010, **132**, 14382–14384.
2. A. Phan, C. J. Doonan, F. J. Uribe-Romo, C. B. Knobler, M. O’Keeffe and O. M. Yaghi, *Accounts Chem. Res.*, 2010, **43**, 58–67.
3. F. Debatin, A. Thomas, A. Kelling, N. Hedin, Z. Bacsik, I. Senkovska, S. Kaskel, M. Junginger, H. Müller, U. Schilde, C. Jäger, A. Friedrich and H.-J. Holdt, *Angew. Chem. Int. Edit.*, 2010, **49**, 1258–1262.
4. M. Du, C. P. Li, M. Chen, Z. W. Ge, X. Wang, L. Wang and C. S. Liu, *J. Am. Chem. Soc.*, 2014, **136**, 10906–10909.
5. Y. E. Cheon, J. Park and M. P. Suh, *Chem. Commun.*, 2009, **36**, 5436–5438.
6. W. Lou, J. Yang, L. Li and J. Li, *J. Solid. State. Chem.*, 2014, **213**, 224–228.



**Table S16.** Detail calibrated adsorption data of O<sub>2</sub>, CH<sub>4</sub>, H<sub>2</sub>, N<sub>2</sub> and CO<sub>2</sub> for Na<sub>8</sub>[Mo<sub>8</sub>O<sub>8</sub>(μ<sub>2</sub>-O)<sub>8</sub>(μ<sub>2</sub>-OH)<sub>8</sub>(3-apz)<sub>4</sub>]<sub>2</sub>·26H<sub>2</sub>O (**1**) at 298 K.

| Gases            | O <sub>2</sub> |                   | CO <sub>2</sub> |                   | CH <sub>4</sub> |                   | N <sub>2</sub> |                   | H <sub>2</sub> |                   |
|------------------|----------------|-------------------|-----------------|-------------------|-----------------|-------------------|----------------|-------------------|----------------|-------------------|
| Temperature (°C) | Pressure (bar) | Adsorption (mg/g) | Pressure (bar)  | Adsorption (mg/g) | Pressure (bar)  | Adsorption (mg/g) | Pressure (bar) | Adsorption (mg/g) | Pressure (bar) | Adsorption (mg/g) |
| 25.0             | 0              | 0                 | 0               | 0                 | 0               | 0                 | 0              | 0                 | 0              | 0                 |
|                  | 0.9            | 3.12896           | 0.9             | 2.26296           | 0.9             | 0.29402           | 0.9            | 1.61535           | 0.9            | 1.06597           |
|                  | 1.9            | 4.41539           | 1.9             | 5.24443           | 1.9             | 0.42723           | 1.9            | 1.84907           | 1.9            | 1.13681           |
|                  | 3.9            | 6.71136           | 3.9             | 6.75948           | 3.9             | 0.42634           | 3.9            | 1.82816           | 3.9            | 1.51252           |
|                  | 5.9            | 8.83502           | 5.9             | 8.83305           | 5.9             | 0.49042           | 5.9            | 2.09596           | 5.9            | 1.68547           |
|                  | 7.9            | 11.28441          | 7.9             | 10.0279           | 7.9             | 0.63139           | 7.9            | 2.2997            | 7.9            | 1.79344           |
|                  | 9.899          | 13.00532          | 9.899           | 10.51599          | 9.899           | 0.75219           | 9.899          | 2.29942           | 9.899          | 1.86436           |
|                  | 11.898         | 16.03821          | 11.898          | 12.38129          | 11.898          | 0.8594            | 11.898         | 2.56169           | 11.898         | 1.97806           |
|                  | 13.897         | 18.09408          | 13.897          | 12.76031          | 13.897          | 0.92508           | 13.897         | 2.68969           | 13.897         | 2.11509           |
|                  | 15.898         | 20.46554          | 15.898          | 14.61157          | 15.898          | 0.98235           | 15.898         | 2.81044           | 15.898         | 1.96378           |
|                  | 17.892         | 22.78616          | 17.892          | 14.6307           | 17.892          | 0.10458           | 17.892         | 2.54029           | 17.892         | 2.10285           |
|                  | 19.894         | 24.79334          | 19.894          | 16.17265          | 19.894          | 1.11984           | 19.894         | 2.73852           | 19.894         | 1.94762           |
|                  | 21.894         | 27.21597          | 21.894          | 16.4973           | 21.894          | 1.22295           | 21.894         | 2.78228           | 21.894         | 2.16093           |
|                  | 23.897         | 29.36634          | 23.897          | 17.1501           | 23.897          | 1.25047           | 23.897         | 2.94039           | 23.897         | 2.25783           |
|                  | 25.891         | 31.14864          | 25.891          | 19.4883           | 25.891          | 1.35201           | 25.891         | 2.96055           | 25.891         | 2.28429           |
|                  | 27.897         | 33.36281          | 27.897          | 20.37474          | 27.897          | 1.73615           | 27.897         | 2.96055           | 27.897         | 2.42783           |
| 29.896           | 35.70517       | 29.896            | 21.12056        | 29.896            | 1.98079         | 29.896            | 3.32752        | 29.896            | 2.3886         |                   |

**Table S17.** Detail calibrated adsorption data of O<sub>2</sub>, CH<sub>4</sub>, H<sub>2</sub>, N<sub>2</sub> and CO<sub>2</sub> for K<sub>8</sub>[Mo<sub>8</sub>O<sub>8</sub>(μ<sub>2</sub>-O)<sub>8</sub>(μ<sub>2</sub>-OH)<sub>8</sub>(3-apz)<sub>4</sub>]<sub>2</sub>·7H<sub>2</sub>O (**2**) at 298 K.

| Gases            | O <sub>2</sub> |                   | CO <sub>2</sub> |                   | CH <sub>4</sub> |                   | N <sub>2</sub> |                   | H <sub>2</sub> |                   |
|------------------|----------------|-------------------|-----------------|-------------------|-----------------|-------------------|----------------|-------------------|----------------|-------------------|
| Temperature (°C) | Pressure (bar) | Adsorption (mg/g) | Pressure (bar)  | Adsorption (mg/g) | Pressure (bar)  | Adsorption (mg/g) | Pressure (bar) | Adsorption (mg/g) | Pressure (bar) | Adsorption (mg/g) |
| 25.0             | 0              | 0                 | 0               | 0                 | 0               | 0                 | 0              | 0                 | 0              | 0                 |
|                  | 0.9            | 1.90564           | 0.9             | 1.93188           | 0.9             | 0.17755           | 0.9            | 1.30711           | 0.9            | 1.0482            |
|                  | 1.9            | 2.34313           | 1.9             | 4.46665           | 1.9             | 0.41781           | 1.9            | 1.71385           | 1.9            | 1.36448           |
|                  | 3.9            | 3.9577            | 3.9             | 6.54667           | 3.9             | 0.50646           | 3.9            | 1.74209           | 3.9            | 1.57429           |
|                  | 5.899          | 5.25999           | 5.899           | 8.63235           | 5.899           | 0.61781           | 5.899          | 1.6044            | 5.899          | 1.67095           |
|                  | 7.899          | 6.73363           | 7.899           | 10.28668          | 7.899           | 0.77755           | 7.899          | 1.76292           | 7.899          | 1.6949            |
|                  | 9.901          | 8.29548           | 9.901           | 10.89093          | 9.901           | 0.8957            | 9.901          | 1.76293           | 9.901          | 1.98097           |
|                  | 11.898         | 9.67019           | 11.898          | 11.63851          | 11.898          | 1.22909           | 11.898         | 1.80255           | 11.898         | 2.01146           |
|                  | 13.898         | 11.00709          | 13.898          | 12.85041          | 13.898          | 1.46978           | 13.898         | 1.83216           | 13.898         | 1.96403           |
|                  | 15.896         | 12.19266          | 15.896          | 13.70906          | 15.896          | 1.73113           | 15.896         | 1.85216           | 15.896         | 1.86834           |
|                  | 17.898         | 13.73702          | 17.898          | 13.94952          | 17.898          | 1.82363           | 17.898         | 1.88002           | 17.898         | 1.78302           |
|                  | 19.899         | 15.09458          | 19.899          | 14.12219          | 19.899          | 2.08517           | 19.899         | 1.92421           | 19.899         | 2.00387           |
|                  | 21.901         | 16.34802          | 21.901          | 14.37056          | 21.901          | 2.28722           | 21.901         | 2.03192           | 21.901         | 2.10909           |
|                  | 23.898         | 17.44163          | 23.898          | 14.45098          | 23.898          | 2.32213           | 23.898         | 2.13192           | 23.898         | 2.59101           |
|                  | 25.901         | 18.90777          | 25.901          | 14.62885          | 25.901          | 2.37824           | 25.901         | 2.28663           | 25.901         | 2.63133           |
|                  | 27.899         | 20.36395          | 27.899          | 14.94952          | 27.899          | 2.48864           | 27.899         | 2.29481           | 27.899         | 2.78893           |
|                  | 29.899         | 21.79289          | 29.899          | 15.04952          | 29.899          | 2.60172           | 29.899         | 2.31928           | 29.899         | 3.18588           |

**Table S18** Detail calibrated adsorption data of O<sub>2</sub>, CH<sub>4</sub>, H<sub>2</sub>, N<sub>2</sub> and CO<sub>2</sub> for (NH<sub>4</sub>)<sub>4</sub>[Mo<sub>8</sub>O<sub>8</sub>(μ<sub>2</sub>-O)<sub>8</sub>(μ<sub>2</sub>-OH)<sub>4</sub>(3-apz)<sub>8</sub>]·20.5H<sub>2</sub>O (**3**) at 298 K.

| Gases            | O <sub>2</sub> |                   | CO <sub>2</sub> |                   | CH <sub>4</sub> |                   | N <sub>2</sub> |                   | H <sub>2</sub> |                   |
|------------------|----------------|-------------------|-----------------|-------------------|-----------------|-------------------|----------------|-------------------|----------------|-------------------|
| Temperature (°C) | Pressure (bar) | Adsorption (mg/g) | Pressure (bar)  | Adsorption (mg/g) | Pressure (bar)  | Adsorption (mg/g) | Pressure (bar) | Adsorption (mg/g) | Pressure (bar) | Adsorption (mg/g) |
| 25.0             | 0              | 0                 | 0               | 0                 | 0               | 0                 | 0              | 0                 | 0              | 0                 |
|                  | 0.9            | 3.12896           | 0.9             | 1.32099           | 0.9             | 0.29402           | 0.9            | 1.82273           | 0.9            | 1.0967            |
|                  | 1.9            | 4.41539           | 1.9             | 4.52066           | 1.9             | 0.42723           | 1.9            | 2.31918           | 1.9            | 1.1027            |
|                  | 3.9            | 6.71136           | 3.9             | 6.71786           | 3.9             | 0.42634           | 3.9            | 2.43304           | 3.9            | 1.30016           |
|                  | 5.9            | 8.83502           | 5.9             | 8.7988            | 5.9             | 0.49042           | 5.9            | 2.3022            | 5.9            | 1.42839           |
|                  | 7.896          | 11.28441          | 7.896           | 10.89091          | 7.896           | 0.63139           | 7.896          | 2.07722           | 7.896          | 1.51916           |
|                  | 9.896          | 13.00532          | 9.896           | 12.01432          | 9.896           | 0.75219           | 9.896          | 2.94041           | 9.896          | 1.62              |
|                  | 11.897         | 16.03821          | 11.897          | 12.2066           | 11.897          | 0.8594            | 11.897         | 2.66057           | 11.897         | 1.6468            |
|                  | 13.893         | 18.09408          | 13.893          | 13.55591          | 13.893          | 0.92508           | 13.893         | 3.0166            | 13.893         | 1.7851            |
|                  | 15.896         | 20.46554          | 15.896          | 13.71729          | 15.896          | 0.98235           | 15.896         | 3.13906           | 15.896         | 1.81732           |
|                  | 17.896         | 22.78616          | 17.896          | 14.73724          | 17.896          | 0.10458           | 17.896         | 3.01442           | 17.896         | 1.83418           |
|                  | 19.895         | 24.79334          | 19.895          | 15.08271          | 19.895          | 1.11984           | 19.895         | 2.89226           | 19.895         | 1.79702           |
|                  | 21.894         | 27.21597          | 21.894          | 15.68434          | 21.894          | 1.22295           | 21.894         | 2.88822           | 21.894         | 1.9948            |
|                  | 23.897         | 29.36634          | 23.897          | 16.06625          | 23.897          | 1.25047           | 23.897         | 3.11785           | 23.897         | 1.66251           |
|                  | 25.895         | 31.14864          | 25.895          | 16.42758          | 25.895          | 1.35201           | 25.895         | 2.71309           | 25.895         | 1.64418           |
|                  | 27.894         | 33.36281          | 27.894          | 17.3163           | 27.894          | 1.73615           | 27.894         | 2.63758           | 27.894         | 1.70475           |
|                  | 29.897         | 35.70517          | 29.897          | 18.21973          | 29.897          | 1.98079           | 29.897         | 2.44146           | 29.897         | 1.7183            |
